# Supplementary material
Source: PubMed Central journal article supplement (PMC6129468)
Supplement: mmc4.pdf [file mmc4.pdf]

# Interactions of HP1 Bound to H3K9me3 Dinucleosome by Molecular Simulations and Biochemical Assays

Shuhei Watanabe,<sup>1</sup> Yuichi Mishima,<sup>2</sup> Masahiro Shimizu,<sup>1</sup> Isao Suetake,<sup>2,3,\*</sup> and Shoji Takada<sup>1,\*</sup>

<sup>1</sup>Department of Biophysics, Graduate School of Science, Kyoto University, Kitashirakawa, Sakyo, Kyoto, Japan; <sup>2</sup>Institute for Protein Research, Osaka University, Suita, Osaka, Japan; and <sup>3</sup>College of Nutrition, Koshien University, Takarazuka, Japan

**ABSTRACT** Heterochromatin protein 1 (HP1), associated with heterochromatin formation, recognizes an epigenetically repressive marker, trimethylated lysine 9 in histone H3 (H3K9me3), and generally contributes to long-term silencing. How HP1 induces heterochromatin is not fully understood. Recent experiments suggested that not one, but two nucleosomes provide a platform for this recognition. Integrating previous and new biochemical assays with computational modeling, we provide near-atomic structural models for HP1 binding to the dinucleosomes. We found that the dimeric HP1 $\alpha$  tends to bind two H3K9me3s that are in adjacent nucleosomes, thus bridging two nucleosomes. We identified, to our knowledge, a novel DNA binding motif in the hinge region that is specific to HP1 $\alpha$  and is essential for recognizing the H3K9me3 sites of two nucleosomes. An HP1 isoform, HP1 $\gamma$ , does not easily bridge two nucleosomes in extended conformations because of the absence of the above binding motif and its shorter hinge region. We propose a molecular mechanism for chromatin structural changes caused by HP1.

## INTRODUCTION

Heterochromatin protein 1 (HP1) is a nonhistone chromosome protein with versatile functions (1–4), including heterochromatin formation, gene silencing in pericentric heterochromatin, control of gene expression, and stabilization of telomeres (1,5). As such, HP1 is found in diverse eukaryotic organisms, with the exception of budding yeast. Heterochromatin spread is supposed to rely on the ability of HP1 self-association (6–8).

Related to its broad range of functions, HP1 has isoforms; for mammals, three isoforms, HP1 $\alpha$ , HP1 $\beta$ , and HP1 $\gamma$ , have been identified (2,4). Despite the apparent similarity in sequences and architectures of the three isoforms, they are known to show different localizations, and their deletions lead to different phenotypes (9–11). HP1 $\alpha$  localizes to heterochromatic regions, whereas HP1 $\beta$  is observed in both heterochromatic and euchromatic regions. HP1 $\gamma$ , but not HP1 $\alpha$  and HP1 $\beta$ , associates with actively transcribed genes

and plays a role in the transcription elongation (12,13). Despite HP1's broad range of functions and properties, little is known about the molecular mechanisms that realize these versatile functions.

HP1 consists of two highly conserved globular domains, the chromo-domain (CD) and chromoshadow-domain (CSD), which are linked by a less-conserved disordered hinge region (HR) of various lengths (Fig. 1 A). The CD is known to recognize the trimethylated lysine 9 in the histone H3 tail (H3K9me3), a major epigenetic marker of heterochromatin (14,15). The CSD forms homo- or heterodimers with CSDs of the same or different isoforms of HP1 (16,17). Although HP1 has been considered to function as a dimer (18), the isoform-specific oligomerization of HP1 has also been reported. Fission yeast HP1 (swi6), as well as human HP1 $\alpha$ , is dimerized via CD and is tetramerized (18,19), whereas HP1 $\beta$  has been revealed to be only dimerized via CSD (20). The dimeric CSD also provides a platform for the assembly of other related proteins, thus working as a hub-like protein (21). The hinge region is enriched with positively charged amino acid residues and disordered (22), which makes HP1 a highly flexible molecule. Notably, the affinity of the CD to an H3K9me3 peptide is rather weak, which implicates more collaborative recognition involving other parts of molecules. Indeed,

Submitted December 14, 2017, and accepted for publication March 26, 2018.

\*Correspondence: [hotsuetake@hotmail.com](mailto:hotsuetake@hotmail.com) or [takada@biophys.kyoto-u.ac.jp](mailto:takada@biophys.kyoto-u.ac.jp)

Shuhei Watanabe and Yuichi Mishima contributed equally to this work.

Editor: Tamar Schlick.

<https://doi.org/10.1016/j.bpj.2018.03.025>

© 2018 Biophysical Society.

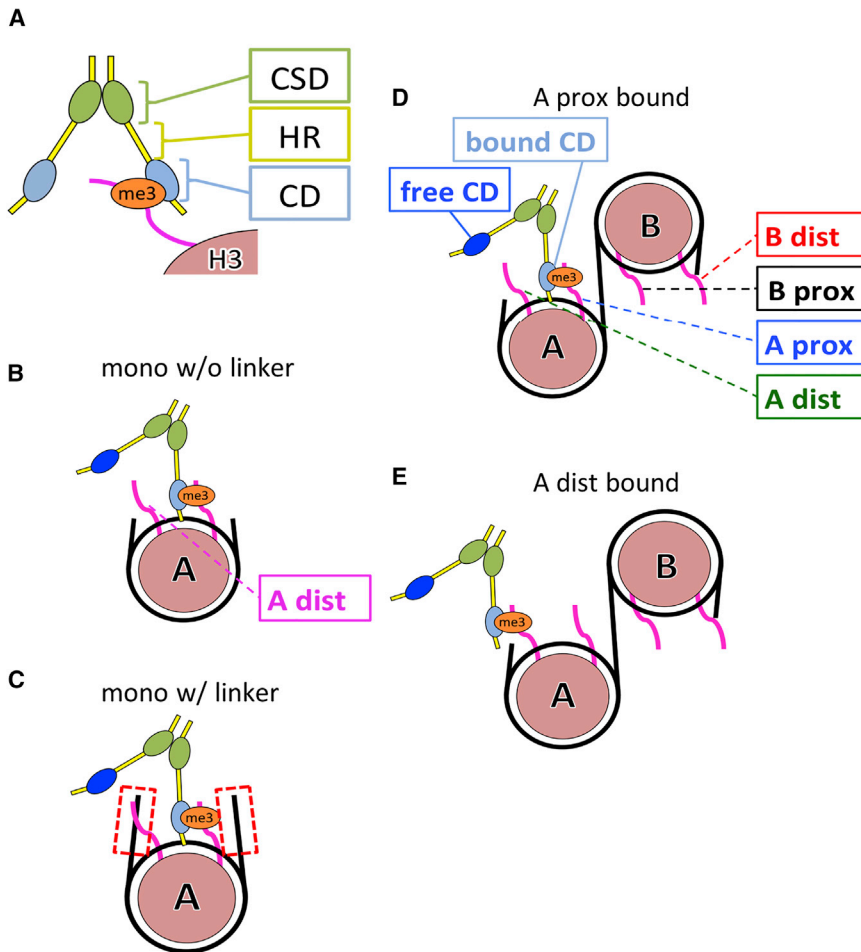

**FIGURE 1** Schematic view of HP1 constructs. (A) The HP1 forms the homodimer via CSD (depicted in *green*) and recognizes the trimethylated H3K9 (shown as “me3”) via the CD (*blue*). Between the two globular domains, a disordered hinge region is present. (B) A mononucleosome without linker DNA is shown. One CD is bound to K9 of one H3, and the other H3 is termed “A-distal H3.” (C) A mononucleosome with two linker DNAs of 25 bp connected to both ends of nucleosomal DNA is shown. (D) A dinucleosome with linker DNA of 25 bp and one CD bound to K9 in a proximal H3 of nucleosome A (designated as “A-prox-bound”) is shown. An unbound CD is termed “free CD.” The other three H3 tails are labeled. (E) A dinucleosome with one CD bound to K9 in a distal H3 of nucleosome A (“A-dist-bound”) is shown. To see this figure in color, go online.

much evidence shows that the hinge region of HP1 binds to DNA in a non-sequence-specific manner, which may facilitate HP1 loading to chromatin (20,23–25). Mouse HP1 (CBX1, 3, and 5) binds not only to a methylated histone tail, but also to the histone-fold domain of histone H3 (17).

Although the molecular architecture of HP1 and the domain-specific functions have been relatively well characterized, how the biochemical features of HP1 lead to versatile phenotypes is largely unknown. This is partly due to the limited number of studies concerning the interaction between nucleosomes and HP1 (6,18,20,24–29). Recently, energy transfer using fluorescently labeled nucleosomes and HP1 has elucidated stochastic HP1-chromatin interaction events (28,29). Electron microscopy observation shows that HP1 clusters on the nucleosomal array (6). How two CDs of HP1 dimer consequently recognize K9me3 on the chromatin structure is crucial for heterochromatin expansion. However, this point has not been revealed. We found that the HP1 $\alpha$  dimer binds to a dinucleosome containing H3K9me3 with a high affinity, but not to a mononucleosome containing H3K9me3 (24). Notably, once linker DNA is attached to both ends of the

mononucleosome, it interacts with HP1 $\alpha$  with a higher affinity than in the case without the linker DNA. The affinities with HP1 $\alpha$  are at the same level between di- and tetranucleosomes with the H3K9me3 marker. These together suggest that the dinucleosome provides a basic platform for the HP1 $\alpha$  dimer to bind on. Remarkably, HP1 $\gamma$  does not strongly bind to an extended form of tetranucleosome to which HP1 $\alpha$  binds strongly (26). When the tetranucleosome took a more compact form, HP1 $\gamma$  recognized the compact tetranucleosome with a high affinity. This provides us a hint for the phenotype differences among isoforms.

However, biochemical assays alone do not provide high-resolution structural insights. For that purpose, structural biology methods may be desired. Yet, because of the highly disordered nature of HP1 and histone tails, standard structural biology methods have not provided high-resolution information, either. As such, computer simulations are potentially useful to obtain high-resolution dynamical structures. But, for this size of molecule that involves large fluctuations, straightforward atomistic molecular dynamics (MD) simulations are not efficient enough to sample a large conformational space. Given

these facts, the mesoscopic Monte Carlo simulation approaches pioneered by Langowski, Schlick and others have opened up structural modeling studies of polynucleosome systems (30–35). More recently, multiscale MD simulations have also been applied to provide structural and dynamical insights into nucleosomes and their interaction with other proteins (36–41). Notably, computer simulations for this size of molecule always need to be verified experimentally.

In this study, using multiscale molecular simulations and biochemical assays, we clarified binding modes of HP1 with mono- and dinucleosomes, from which we obtained a near-atomic resolution structural model of the HP1-dinucleosome complex. We also tested the current computational results by biochemical experiments.

## MATERIALS AND METHODS

### Biochemical experiments expression and purification of proteins

The cDNA of human wild-type HP1 $\alpha$  and  $\gamma$  or mutated HP1 were subcloned from pGEX-6P1, as described by Mishima et al. (26). Full-length and mutagenized HP1 were expressed and purified as described (26). Recombinant histones and H3K9me3 were prepared as described elsewhere (24).

### Preparation of dinucleosomes

The 601.2 tandemly repeated DNA templates with 25-bp linker DNA are shown in Fig. S1. Nucleosomes were reconstituted with histone octamers prepared with recombinant histones and the template by a salt-dialysis method (42,43). The reconstituted dinucleosomes were purified by glycerol density-gradient centrifugation as described (42). The concentrations of dinucleosomes were determined by measuring the absorbance at 260 nm.

### Pull-down assay

The binding activity of HP1 to dinucleosomes was determined as described by Mishima et al. (26). Briefly, 80 pmol of glutathione S-transferase (GST), GST-HP1 $\alpha$  (wild-type (WT) or mutant (mut)), and GST-HP1 $\gamma$  bound glutathione Sepharose (GE Healthcare, Little Chalfont, UK) of 10  $\mu$ L packed volume was mixed with 1 pmol reconstituted nucleosomes in 20  $\mu$ L of a binding buffer comprising 50 mM NaCl, 0.2 mM dithiothreitol, 0.2 mM phenylmethylsulfonyl fluoride, 1 mM ethylenediaminetetraacetic acid, 0.1% (v/v) Nonidet P-40, 20% (v/v) glycerol, and 20 mM Tris-HCl (pH 7.4). The input, unbound, wash, and bound fractions were subjected to sodium dodecyl sulfate-polyacrylamide gel (SDS-PAGE), and proteins were fluorescently detected by using Lumitein (Biotium, Fremont, CA). The density of histone bands was quantitated with Image Gauge V4.0 software (GE Healthcare).

### Gel shift assay

GST-HP1 (1, 2, or 4  $\mu$ M) was mixed with 25 nM of mononucleosomal DNA without linker, of length 147 bp, in the binding buffer. After the incubation, the mixtures were electrophoresed in a 0.7% agarose gel with 0.5 $\times$  Tris-borate-ethylenediaminetetraacetic acid, and then DNA bands were stained with GelGreen (Biotium) and quantitated with a fluoro-

imager, FLA9500 (GE Healthcare, Massachusetts), as described by Mishima et al. (26).

## Reference structures for computer modeling

For nucleosome structures, we refer to the x-ray crystallographic structures, for which the Protein Data Bank (PDB) code is 1KX5 (44). Combining the structures with the 25-bp-long standard B-type DNA model, we generated dinucleosome structures. The native structures for the CD and CSD were taken from 3FDT and 3I3C, respectively. The complex structure of the CD with the H3K9me3-containing peptide was also taken from 3FDT (45).

## Coarse-grained MD simulations

We briefly describe the simulations method here. We used a total energy function that consists of three terms,

$$V_{\text{total}} = V_{\text{protein}} + V_{\text{DNA}} + V_{\text{protein-DNA}},$$

where the first, the second, and the third terms represent potential energies for proteins, DNA, and the interaction between them, respectively.

For proteins, we utilized the atomic interaction-based CG model 2+ (AICG2+) developed by Li et al. (46,47):

$$\begin{aligned} V_{\text{protein}} = & \sum_{ibd} K_{b,ibd} (b_{ibd} - b_{ibd,0})^2 + V_{loc}^{flp} \\ & + \sum_{j=i+2} \epsilon_{loc,ij} \exp\left(-\frac{(r_{ij} - r_{ij0})^2}{2W_{ij}^2}\right) \\ & + \sum_{j=i+3} \epsilon_{loc,ij} \exp\left(-\frac{(\phi_{ij} - \phi_{ij0})^2}{2W_{\phi,ij}^2}\right) \\ & + \sum_{\substack{nat\ contact \\ i < j-3}} \epsilon_{go,ij} \left[ 5 \left(\frac{r_{ij0}}{r_{ij}}\right)^{12} - 6 \left(\frac{r_{ij0}}{r_{ij}}\right)^{10} \right] \\ & + \sum_{\substack{non-native \\ i < j-3}} \epsilon_{ev} \left(\frac{d}{r_{ij}}\right)^{12}. \end{aligned}$$

Here, the first term means virtual bonds between adjacent amino acids, and the second term represents the sequence-dependent bond-angle and dihedral-angle potentials defined below. The third and fourth terms are structure-based local potentials giving biases to the native local structures. The fifth term is the native contact potential that binds amino acid pairs that are found in the native structures. The last term is a simple short-ranged repulsion. The third term,  $V_{loc}^{flp}$ , is a sum of the two contributions: the bond-angle potential and the dihedral-angle potential, both of which were obtained via the Boltzmann inversion of the probability distributions in a loop library from the PDB, specifically,

$$V_{ba}(\theta) = -k_B T \ln \frac{P(\theta)}{\sin(\theta)},$$

$$V_{dih}(\varphi) = -k_B T \ln P(\varphi)$$

where  $P(\theta)$  and  $P(\varphi)$  are the probability distributions of the corresponding variables estimated from a loop library of PDB structures. See the original work for a more detailed description of the AICG2+ potential (46). For intrinsically disordered regions, we did not include the structure-based term and thus used only the first, the second, and the last terms. For histones, the N-terminal 43, 23, 15, and 33 residues in H3, H4, H2A, and

H2B were treated as the intrinsically disordered regions. For HP1, we set residues 1–19, 69–120, and 181–191 as disordered regions.

For DNA, we used the 3SPN.1 model developed by the de Pablo group (48):

$$\begin{aligned}
 V_{DNA} = & \sum_i \left[ k_{bd1}^{dna} \left( r_{i,i+1} - r_{i,i+1}^0 \right)^2 + k_{bd2}^{dna} \left( r_{i,i+1} - r_{i,i+1}^0 \right)^4 \right] + \sum_i \frac{k_{ba}^{dna}}{2} (\theta_i - \theta_i^0)^2 + \sum_i k_{\phi}^{dna} [1 - \cos(\phi_i - \phi_i^0)] \\
 & + \sum_{i < j}^{stack} 4 \epsilon_{st}^{dna} \left[ \left( \frac{r_{ij}^0}{r_{ij}} \right)^{12} - \left( \frac{r_{ij}^0}{r_{ij}} \right)^6 \right] + \sum_{i < j}^{base} \epsilon_{bp_i}^{dna} \left[ 5 \left( \frac{\sigma^{bp_i}}{r_{ij}} \right)^{12} - 6 \left( \frac{\sigma^{bp_i}}{r_{ij}} \right)^{10} \right] \\
 & + \sum_{i < j}^{non-native} \begin{cases} 4 \epsilon_{ev}^{dna} \left[ \left( \frac{\sigma^{dna}}{r_{ij}} \right)^{12} - \left( \frac{\sigma^{dna}}{r_{ij}} \right)^6 \right] + \frac{1}{4}, & \text{if } r_{ij} < 2 \frac{1}{6} \sigma^{dna} \\ 0, & \text{otherwise} \end{cases} \\
 & + \sum_{i,j}^{elec} \frac{q_i q_j e^{-\frac{r_{ij}}{\kappa_D}}}{4 \pi \epsilon_0 \epsilon r_{ij}} + \sum_{i < j}^{solv} \epsilon_s \{ [1 - e^{-\alpha(r_{ij} - r_s)}]^2 - 1 \}
 \end{aligned}$$

See the original work for more details.

For protein-DNA interactions, we defined the following energy function,

$$\begin{aligned}
 V_{pro-dna} = & \sum_{i < j}^{nat\ contact} \epsilon_{go}^{pro-dna} \left[ 5 \left( \frac{r_{ij}^0}{r_{ij}} \right)^{12} - 6 \left( \frac{r_{ij}^0}{r_{ij}} \right)^{10} \right] \\
 & + \sum_{i < j}^{non-native} \epsilon_{ev}^{pro-dna} \left( \frac{\sigma^{pro-dna}}{r_{ij}} \right)^{12} + \sum_{i,j}^{elec} \frac{q_i q_j e^{-\frac{r_{ij}}{\kappa_D}}}{4 \pi \epsilon_0 \epsilon r_{ij}},
 \end{aligned}$$

where the first term is for the specific interaction imposed between nucleosomal DNA and histones, whereas the second and the third terms are general physical-chemical interactions; the second term is a simple short-range repulsion, and the third term is the Debye-Hückel electrostatic interactions. We chose  $\sigma^{pro-dna} = 6.0 \text{ \AA}$ . The  $\epsilon_{go}^{pro-dna}$  value was determined to be  $0.8 \times$  the default contact energy for proteins (0.3) for mononucleosomes in the previous work (49). Integer charges were set for each CG particle: +1 for Arg and Lys and -1 for Asp, Glu, and P (the phosphate group). The dielectric constant is set as  $\epsilon = 78$ . The Debye screening length  $\kappa_D$  is calculated as usual, depending on the in silico ionic strength.

The equation of motion that drives the system is the standard Langevin equation,

$$m_i \frac{d^2 r_i}{dt^2} = - \frac{\partial V_{total}}{\partial r_i} - m_i \gamma_i \frac{dr_i}{dt} + m_i \xi_i,$$

where the random noise is the Gaussian white noise with the mean and variance

$$\langle \xi_i(t) \rangle = 0, \quad \langle \xi_i(t) \xi_j(t') \rangle = \frac{2 \gamma_i k_B T}{m_i} \delta(t - t') \delta_{i,j},$$

respectively.  $k_B$  is the Boltzmann constant, and  $T$  is the temperature set as 300 K.  $\gamma$  is the friction coefficient, and we used a low friction (0.02 in CafeMol unit (50)) to speed up the dynamics. Each MD trajectory contains  $10^8$  steps starting from the above-mentioned extended configuration.

For MD, we used the CG MD software CafeMol developed in our group throughout the work (50). This software is freely available at <http://www.cafemol.org>, and this work is reproducible by CafeMol 2.1. Unless otherwise denoted, we used the default parameter values in CafeMol.

## Reverse-mapping from a coarse-grained model to a fully atomistic model

For protein, we constructed a fully atomistic model by a one-to-one threading method of the PHYRE2 modeling server (51). For DNA, we modeled the fully atomistic structure by superposing fully atomistic nucleotides on each coarse-grained nucleotide and replacing the coarse-grained model with the fully atomistic model. Fully atomistic nucleotides (dAMP, dGMP, dTMP, dCTP) were obtained from a B-type DNA structure generated by NAB (52,53), and we superposed three points (center-of-mass of sugar, center-of-mass of phosphate, N1 or N5 atom) on the corresponding coarse-grained particle. When we modeled the 5' nucleotide, we used the center-of-mass of sugar of 5' nucleotide, the N1 or N5 position of the nucleotide, and the center-of-mass of the phosphate of the adjacent nucleotide for superposition.

## Fully atomistic MD simulations

MD simulations were conducted by GROMACS 5.1.1 (54–56). The simulation system was a triclinic box with periodic boundary conditions, including proteins, DNA, 350,048 water molecules, 1031  $\text{Na}^+$  ions, and 679  $\text{Cl}^-$  ions. Ions were added to neutralize the total charge and to set ion concentration to  $\sim 0.1$  M. We used the Amber99sb force field with parmbsc0 parameters and the TIP3P water model (57–61). We used particle mesh Ewald methods (62) for electrostatic interactions with a 1.0-nm short-range cutoff. The cutoff for van der Waals interactions was 1.0 nm. First, we conducted energy minimization by the steepest-descent minimization algorithm. Second, we conducted NVT equilibration at 300 K for 100 ps. Next, we conducted NPT equilibration at 300 K, 1 bar for 1 ns. Finally, the production run was conducted at 300 K, 1 bar for 30 ns. In the equilibration steps, we restrained the position of all heavy atoms. In the NVT equilibration, NPT equilibration, and production run, all covalent bonds were constrained by Linear Constraint Solver (LINCS) (63). For the water molecules, we used SETTLE (64). For the thermostat, we used the velocity rescaling method (65). For the NPT equilibration and production run, the Parrinello-Rahman barostat was used (66).

## Analysis

We used the gmh bond program for counting the number of hydrogen bonds (54,55). To find atom pairs forming a hydrogen bond, we used the gmh bond and inspected visually.

## RESULTS

### HP1 $\alpha$ binding to dinucleosome: biochemical experiments

By using the extended dinucleosomes reconstituted *in vitro* as binding substrates, we have recently reported that HP1 $\alpha$  specifically binds to nucleosomes reconstituted with H3K9me3 (24). In this construct, two nucleosome core particles are connected by 20-bp linker DNA. If this linker DNA takes the standard B-type duplex DNA shape with one turn of 10.4 bp, the histone H3 tails on the two nucleosome core particles face almost the same direction (Figs. S1 and S2). To investigate the effect of the relative orientation of two nucleosomes, we made a construct with the length of linker DNA increased by 5 bp. By using the DNA template with 25-bp linker DNA, we have reconstituted dinucleosomes (Fig. S3) and validated the nucleosomes with restriction enzymes and micrococcal nuclease (Fig. S3, B and C). We then examined the interaction between the dinucleosome and the beads on which GST or GST-HP1 $\alpha$  bound (Fig. S4). The dinucleosome reconstituted with H3K9me3 selectively bound to GST-HP1 $\alpha$  (Fig. 2 A and B). As a control, the dinucleosome could not be recovered on GST bound on beads (Fig. 2 B), irrespective of H3K9 methylation status. The binding activity was comparable to the reported results using dinucleosomes with 20-bp linker DNA (24), suggesting that HP1 $\alpha$  did not recognize the relative rotational positioning of core particles. To test a possible artifact of the GST tag, we used Flag-tagged HP1 $\alpha$  (F-HP1 $\alpha$ ), finding that it significantly bound to dinucleosomes with 25-bp linker DNA in H3K9me3 dependent manner (Fig. S5).

### Modeling the HP1-dinucleosome complex by simulations

Both HP1 and dinucleosomes are highly flexible molecules containing intrinsically disordered regions, and therefore computational modeling is useful to characterize their structural assembly. Yet conventional fully atomistic MD simulations are currently too time-consuming for these large systems. Thus, here we used a coarse-grained (CG) MD approach that we have been developing (46,50,67,68).

In our CG MD approach, each amino acid in proteins is simplified as a single particle located at its C $\alpha$  position, whereas each nucleotide in DNAs is represented by three particles, one each for phosphate, sugar, and base. For proteins, globular domains for which crystallographic structures are available are biased to their structures with fluctuations (46), whereas disordered tails are treated as flexible chains for which conformations depend on their amino acid sequences (69). We have previously examined and applied this model to several proteins, including

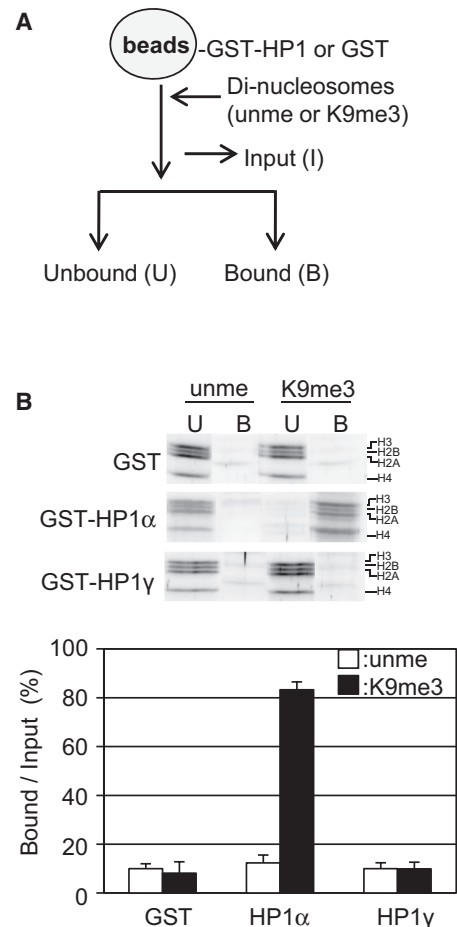

**FIGURE 2** Biochemical assay of HP1 binding to dinucleosomes with 25-bp linker DNA. (A) A schematic illustration of the pull-down assay is given. The number of dinucleosomes bound to GSH Sepharose on which GST-HP1 or GST were anchored were analyzed. (B) HP1 isoform-specific dinucleosome binding activity is shown. Dinucleosomes reconstituted with unmethylated H3 (unme) or H3K9me3(K9me3) were mixed with the beads, and the unbound (U) and bound (B) fractions were separated and then subjected to SDS-PAGE (upper panel). SDS-PAGE data are taken from the whole gel image shown in Fig. S11. The amounts of each histone in the bound fractions over input (%) are shown as mean  $\pm$  standard error ( $n = 3$ ) (lower panel).

protein complexes with DNA (46,47,49,70). DNA was modeled to stabilize the standard B-type DNA with certain bending rigidity (48), which allows it to bend spontaneously as well as upon binding to proteins. At the nucleosome core, interactions between histone cores and nucleosomal DNA were tuned in our previous work (49) and are utilized here. Because HP1 is dimerized via its CSD domain with high affinity, we put attractive interactions between two CSD domains so that HP1 keeps the dimeric form throughout the simulations. Similarly, between the H3K9-trimethylated fragment in H3 tails and the CD of HP1, we put a structure-based attractive interaction so that these interactions are kept throughout the simulations. We note that this attractive interaction is

added purely based on experimental knowledge: The CD domain has significant affinity to the H3K9-trimethylated fragment of H3 tails, and there exists a complex crystal structure of a close homolog of the CD domain with the H3K9-trimethylated fragment of H3 tail (45). In our current structural modeling, the strength of this attractive interaction would not affect the overall structure. For other parts, the interactions between HP1 and the dinucleosome are electrostatic interactions and steric repulsions. The time propagation in MD was conducted by the standard Langevin dynamics with the stochastic force.

We begin with a simulation setup of an HP1 $\alpha$  dimer bound on a dinucleosome where one of the CDs in the HP1 $\alpha$  dimer is bound to an H3 tail, of which K9 is assumed to be trimethylated (Figs. 1 D and 3 A). The other CD is un-

bound to the H3 tail (termed the free CD). The other three H3K9s are assumed to be unmethylated. (Note that we are interested in the case where all the four H3K9s in the dinucleosome are trimethylated. Here, to estimate the expected time that the free CD finds one of the H3K9, we used unmethylated H3K9s in this simulation. If all the H3K9s were trimethylated in the simulation, the free CD would be bound to one of the H3K9s first met in the simulation and would not sample any more. Assumed here is that the expected time of the free CD to approach the H3K9s is independent of the methylation state of their H3K9s.) For convenience, we designate the nucleosome that binds HP1 as nucleosome A and the other as nucleosome B. Of the two H3 tails in nucleosome A, we first chose the one that is close to the linker DNA for the docking to the CD domain and thus

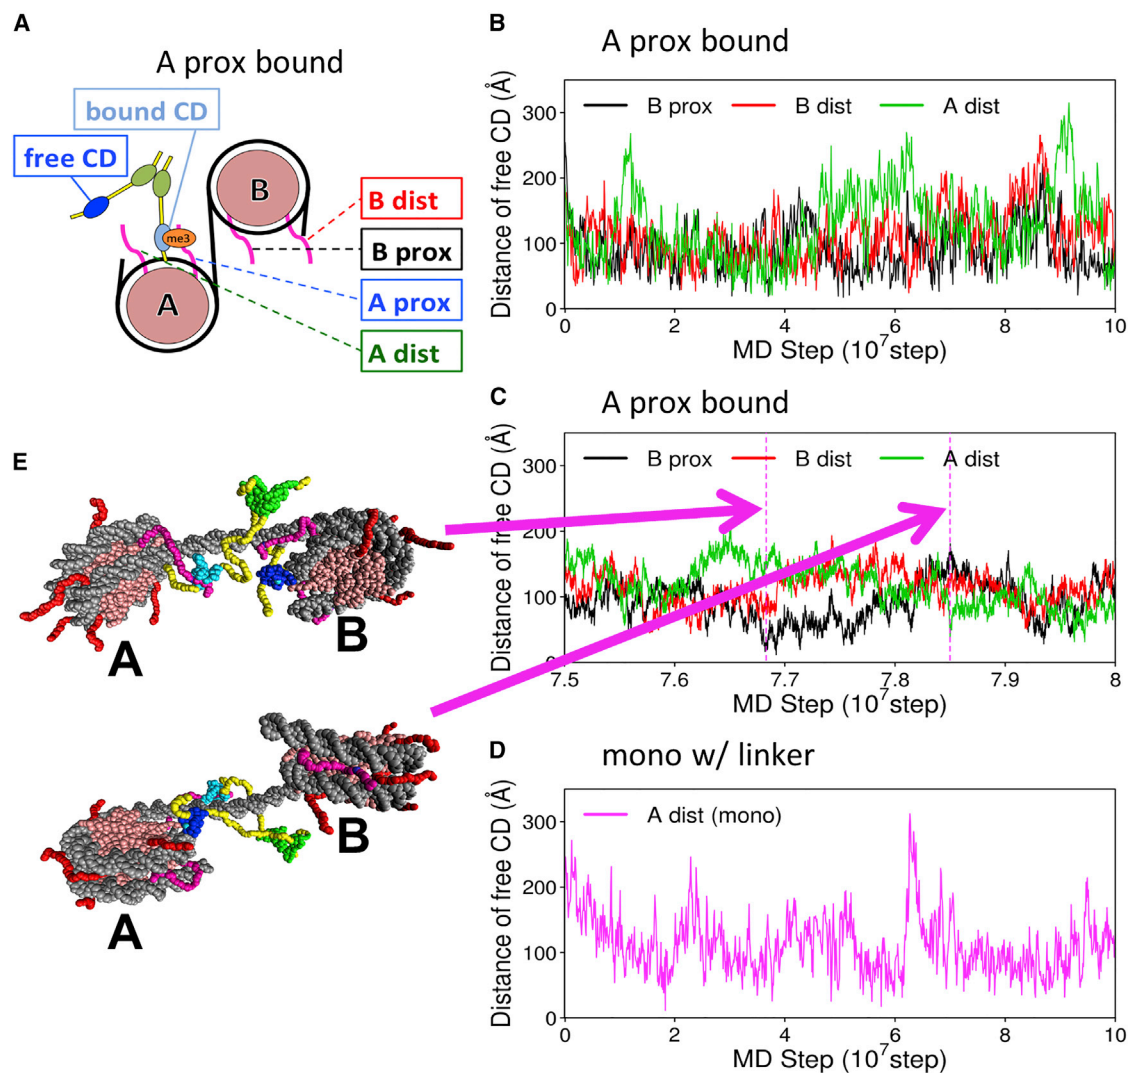

FIGURE 3 Representative trajectories of HP1 $\alpha$  on nucleosomes. (A) The construct used is shown. One CD is bound on the trimethylated “A-proximal H3K9,” and the other CD is free at the initial conformation. The other three H3K9s are assumed to be unmethylated. (B) Time courses of the distances from the free CD to three H3K9s are plotted. (C) A close-up view of a time window in (B) is shown, in which two snapshots depicted in (E) occur. (D) For a mononucleosome without linker DNA, the time course of the distance between the free CD and the A-distal H3K9 is shown. To see this figure in color, go online.

designate this setup as “bound CD on A-proximal H3 tail” (Fig. 3 A).

With this setup, we performed 10 independent MD simulations with stochastic forces at 300 K with the monovalent ion concentration 100 mM. During the simulations, we monitored distances between the three unmethylated H3K9s and the free CD (Fig. 3 A for the definition of the free CD; for the distances, we used the distance between the Glu52 of HP1 and Lys9 of H3 that are located at the binding sites). For a representative trajectory, the time series of the three distances are plotted in Fig. 3, B and C together with some snapshots in Fig. 3 E (video is available as Video S1). At the initial configuration (Fig. S6), the free CD domain was placed far from any of the three unmethylated H3K9s so that all the distances are large. After a quick decrease in these distances at the initial phase, they fluctuated largely in the range of 50–150 Å. Very rarely, however, we see the free CD approach some of the unmethylated H3K9.

Focusing on these rare approaches of the free CD to the unmethylated H3K9, we obtained histograms of the distances between H3K9 and the free CD at a short-distance range (Fig. 4 A). To avoid possible bias due to an arbitrary initial structure, in each of the 10 trajectories, we only used data obtained in the second half of the stimulation time for statistical analysis. We see in the figure that, of the three unmethylated H3K9s, the free CD preferentially approached the K9 in the proximal H3 tail in nucleosome B (“B-proximal” *black curve* in Fig. 4 A). Notably, even

though the H3K9 of nucleosome A that is distant from the linker DNA (“A-distal”) belongs to the same nucleosome as the H3K9 to which the bound CD is tethered, the free CD did not approach frequently to the “A-distal” H3K9. The third unmethylated H3K9, called “B-distal,” was rarely approached, too.

For statistics, we counted the events of approach of the free CD to unmethylated H3K9 within  $2.5 \times 6.6 = 16.5$  Å in the second half of the trajectory data (shown in Fig. 4 C), in which 6.6 Å corresponds to the distance between HP1 $\alpha$ E52 and H3K9 at the complex crystal structure (Fig. S7). Clearly, the approach events of the free CD were dominated by the “B-proximal” H3K9.

Next, we changed the trimethylated H3K9 site from the “A-proximal” H3 to the “A-distal” H3 and conducted the same kind of simulations and analysis as above (this setup termed the “bound CD on A-distal H3 tail”). The other three H3K9s are assumed to be unmethylated. Monitoring the three distances from the free CD to the unmethylated H3K9s, we obtained an apparently similar time series as above (Fig. S8). The distances largely fluctuated in the range of 50–150 Å and only rarely decreased so that the free CD could interact with H3K9s. The histogram of the three distances depicted in Fig. 4 B shows that the free CD preferentially approached to “B-distal” H3K9. The approaches to the “A-proximal” and “B-proximal” H3K9s were less frequent. Using the same threshold as above, the number of approach events was the largest for the “B-distal” H3K9 (Figs. 1 E and 4 C). In the same way as above, the

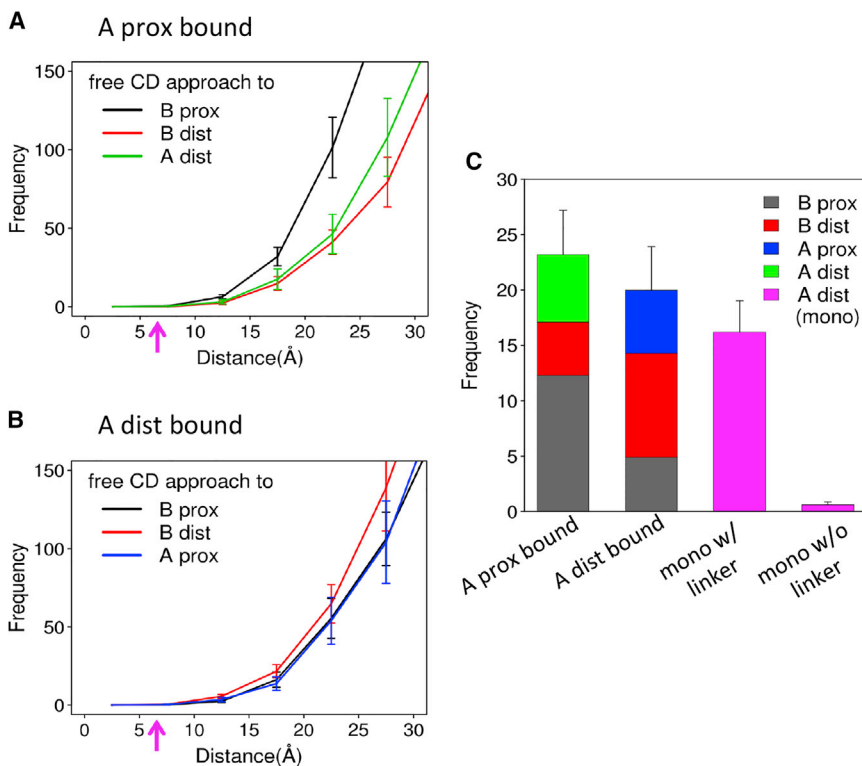

FIGURE 4 Results of HP1 $\alpha$ -dinucleosome molecular simulations in which one CD is bound on the trimethylated H3K and the other CD is free. (A) Statistics of the distances between the free CD and unmethylated H3K9s are shown. One CD is bound on the “A-proximal H3K9.” The red arrows show 6.6 Å, corresponding to the distance at the complex crystal structure of the CD with an H3K9-trimethylated H3 tail fragment. (B) The case of “A-distal H3K9” (*bottom*) is shown. (C) The number of occurrences in which the distance was below 16.5 Å is given. Results with larger and smaller cutoffs are given in Fig. S12. To see this figure in color, go online.

approach to the H3K9 that belongs to the same nucleosome as the H3K9 to which the bound CD is tethered was notably rare (“A-proximal”).

We then set up another simulation system in which all the H3K9s in the dinucleosome were trimethylated so that both of the CDs could bind to H3K9s (note that this setup is similar to Fig. 1 D, in which all the H3K9s in H3 tails (*purple*) are now regarded as trimethylated). We started the simulation with one CD bound on one of H3K9s and the other CD free, observing if and to where the free CD binds.

When the CD was bound on “A-proximal” H3K9 at the initial conformation, we found that, in 9 out of 20 runs, the free CD was bound to the “B-proximal H3K9.” The free CD was bound on the “B-distal H3K9” in 4 runs out of 20. Thus, for 13 of 20 cases, HP1 $\alpha$  bridged the two nucleosomes. In only four runs, the free CD bound on the “A-distal H3K9” so that HP1 $\alpha$  bound to two of the H3K9s in nucleosome A. For the other three cases, the free CD remained free by the end of simulations. Thus, the results are consistent with the earlier simulation setup in which only one of the H3K9 sites was trimethylated.

In summary, the comparative simulations that started with one CD bound on nucleosome A and the other CD free of binding suggest that the free CD preferentially approaches/binds to the H3K9 of nucleosome B, thus bridging the two nucleosomes.

### Modeling HP1-mononucleosome complex by simulations

A previous *in vitro* experiment showed that HP1 $\alpha$  binds to the H3K9 trimethylated dinucleosome more preferentially than its binding to the H3K9 trimethylated mononucleosome (24). Notably, for the case of the mononucleosome, the binding probability markedly increased with the linker DNA attached to both ends of nucleosomal DNA. This suggests roles of nonspecific interaction of HP1 $\alpha$  to the naked dsDNA. Here, we exemplified these differences and sought a structural reasoning for them.

For this purpose, we conducted the same kind of simulations for HP1 $\alpha$  bound to a mononucleosome with and without linker DNA (Fig. 1, B and C). For the case with the linker DNA, we connected a 25-bp linker DNA to each end of the nucleosomal DNA. In each construct, one H3K9 is trimethylated and one CD is bound at the initial condition. During MD simulations, we observed distances between the free CD and another H3K9 that was assumed to be unmethylated. A representative time course of the distance between the free CD and the unmethylated H3K9 is depicted in Fig. 3 D. Similar to the case of the dinucleosome, the distance fluctuated in the range of 50–150 Å. We performed 10 independent MD runs, each containing 10<sup>8</sup> MD steps.

The number of approaches of the free CD to the unmethylated H3K9 was very rare for the mononucleosome without

the linker DNA (Fig. 4 C). With the linker DNA, the number of approaches to the unmethylated H3K9 increased greatly but was still smaller than that for the case of dinucleosomes. The linker-DNA-dependent binding activity of HP1 $\alpha$  to mononucleosomes is consistent with the biochemical analysis reported. With the H3K9 trimethylated dinucleosome, HP1 $\alpha$  prefers bridging two nucleosomes. The same binding mode is not available with the mononucleosome, in which HP1 $\alpha$  cannot effectively bind to the two H3K9s on a single nucleosome.

### Interactions between HP1 $\alpha$ and DNA: computational analysis

Although our molecular simulations gave consistent results with biochemical experiments, the underlying mechanisms were not clear yet. Here, we analyze in detail the physical interactions between HP1 and DNA in dinucleosomes. For the simulations of the HP1 $\alpha$ -dinucleosome system in which one CD was bound on the trimethylated H3K9 in nucleosome A, we obtained the contact frequencies of every amino acid of HP1 to every nucleotide in the dinucleosome, averaged over snapshots in the second half of all 10 trajectory data (Fig. 5 A). Here, the contact was defined by the approach of the amino acid within 10 Å to one of the nucleotide particles.

Clearly, in Fig. 5 A, the major interactions were found in the linker DNA region, with some minor interactions near the dyad in nucleosome A, the position of which is

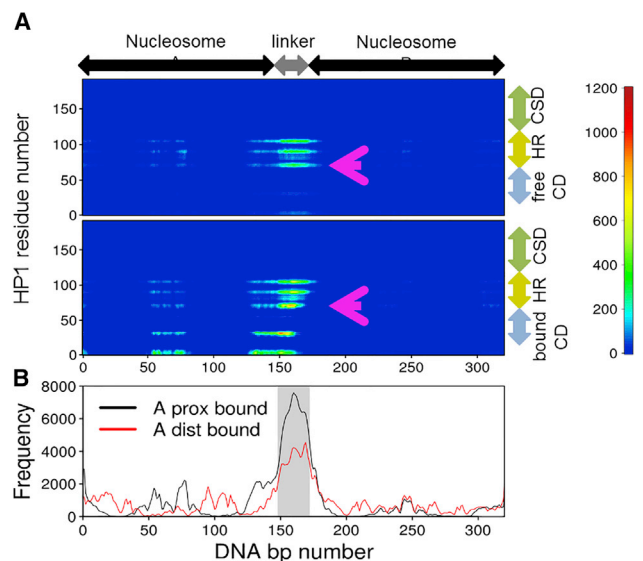

FIGURE 5 HP1 $\alpha$ -DNA interactions in molecular simulations. (A) The horizontal axis indicates the DNA base pair index of dinucleosome, 1–147; nucleosome A, 148–172; and linker DNA, 173–319. The vertical axis means residues in the HP1 $\alpha$  dimer, the bottom half for the bound HP1 $\alpha$  and the top half for the free HP1 $\alpha$ . Contact frequencies are represented by colors (see the *right bar* for the color definition). (B) The frequency of HP1 $\alpha$  binding to every nucleotide in DNA is shown. To see this figure in color, go online.



~50–75-bp from the 5' end. The latter's minor interaction region is located on the entry/exit site of nucleosome structure, which is close to the position of the histone H3 tail.

Among the amino acids in HP1 $\alpha$ , five regions showed clear interactions with DNA: the first region, around residue 5, is in the N-terminal tail; the second region, around residue 30, is in the CD; and those around residues 70, 90, and 105 are within the disordered hinge region. Both the sequences KKTKRT at 3–8 and DRRVVK at 27–32 are basic and thus are expected to be attracted to DNA in a non-sequence-specific manner. In these two regions of the two HP1 $\alpha$  molecules, only the first monomer showed significant contacts with DNA.

More notable interactions are found in the three segments in the hinge region of HP1 $\alpha$  that interacted with DNA; their sequences are KYKKMK at 69–74, SNKRKS at 87–92, and KSKKKR at 102–107, highly positively charged. This strong nonspecific interaction in the hinge region with DNA is consistent with earlier experimental reports: in more detail, of the three segments, the latter two have been investigated based on their high sequence conservation among HP1 isoforms (24,25,71). However, the first one, whose sequence is not conserved, has not been characterized before. These segments in the hinge region interacted primarily with the linker DNA, with some minor interactions with the near-dyad region of DNA. Notably, not only the hinge region in the bound HP1 $\alpha$  but also that in the free HP1 $\alpha$  showed marked interaction with the linker DNA. With these interactions, both of the hinge regions are near the linker DNA, and thus the free HP1 $\alpha$  must be directed toward nucleosome B. Naturally, the free CD approaches most frequently to the “B-proximal” H3K9, as we observed in our comparative simulations above. For another construct in which the CD is bound on the distal H3 of nucleosome A, we found rather similar interaction patterns (Fig. 5 B).

Interactions at the N-terminal region KKTKRT at 3–8 with DNA are consistent with the report that the N-terminal region of HP1 $\alpha$  enhances the DNA binding activity of the hinge region (25). Recently, it was reported that this segment KKKTKR intramolecularly interacts with the following acidic segment, EDEEE at 15–19, and Tyr20/Val21 in a recombinant HP1 $\alpha$  that contains CD and the N-terminal tail (72). In this study, this intramolecular interaction was not observed in the presence of nucleosomes, indicating that KKKTKR dominantly binds to DNA when HP1 $\alpha$  binds to nucleosomes. Together, these results suggest that the basic segment contributes to the binding of HP1 $\alpha$  with multilayered regulations.

Thus, in summary, when one CD is bound on nucleosome A with the trimethylated H3K9, the preferential approach of the free CD to nucleosome B can be understood by the electrostatic attractions between basic segments of the hinge region of HP1 and the linker DNA. Interactions found in the current simulations are consistent with previous experiments. On top of this, we found what is to our knowledge a

new interaction at KYKKMK at 69–74, which will be assessed biochemically below.

### Interactions between HP1 $\alpha$ and DNA: biochemical assays

Of the three basic segments in the hinge region of HP1, two patches, KKK around residue 105 and KRK around residue 90, have been investigated (24,25,71), because the patches are conserved among HP1 isoforms (Fig. S9 A). These two patches are crucial for the nucleosome binding to H3K9me3 in a specific manner in vitro (24) and for the intranuclear localization in vivo (71). Here, we examine the newly found third basic patch around residue 70 suggested in Fig. 5 A, KKYKKMK, which is located at vicinity of the C-terminal end of CD and is specific to HP1 $\alpha$  but not to other isoforms.

To verify the possible function of these basic amino acids on the interaction between HP1 $\alpha$  and nucleosomes, we prepared several HP1 $\alpha$  mutants (Fig. 6 A; Fig. S4) and examined their binding activity (Fig. 6). The binding activity of GST-HP1 $\alpha$  1mut, in which lysine at 68 (K68) was substituted with alanine, to the dinucleosome was significantly reduced (Fig. 6 B) compared with WT HP1 $\alpha$  (Fig. 2 B). When two mutations, K68A and K69A, were simultaneously introduced in GST-HP1 $\alpha$  (GST-HP1 $\alpha$  2mut), the amount of dinucleosome recovered in the bound fraction was significantly reduced, irrespective of K9 methylation status (Fig. 6 B). The GST-HP1 $\alpha$  3mut in which K68, 69, 71, and 72 were substituted with alanine did not bind to dinucleosomes (Fig. 6 B).

In our previous study, mutations in basic amino acid patches (KRK or KKK) in the middle region of HP1 $\alpha$  hinge region reduced the binding activity to naked DNA and to the nucleosome (24). Here, we examined the effect of the above three mutations on the naked-DNA binding activity by gel shift assay (Fig. 6 C). GST-HP1 $\alpha$  1mut showed significant DNA binding activity, but the activity was reduced (Fig. 6 C, lanes 5–7) compared with WT (Fig. 6 C, lanes 2–4). The binding activities of GST-HP1 $\alpha$  2mut and 3mut were below the detection level (lanes 8–10 and 11–13 in Fig. 6 C). In the absence of the GST tag, Flag-HP1 $\alpha$  3mut also did not show the binding activity to dinucleosomes, irrespective of K9 methylation status (Fig. S5). Together, as expected by computer simulation, the basic amino acids existing in the vicinity of the C-terminal region of CD are crucial for the binding to DNA and nucleosomes. Notably, these basic residues are not conserved among HP1 isoforms (Fig. S9 A), suggesting this region could contribute to isoform-specific binding. On the other hand, the basic residues of HP1 $\alpha$  are conserved from fish to human (Fig. S9 B), supporting its biological relevance.

It has been reported that K69, K71, K72, K84, K104, and K106 in HP1 $\alpha$  are identified to be potentially sumoylated in vitro (73). Maison et al. also reported that the sumoylation

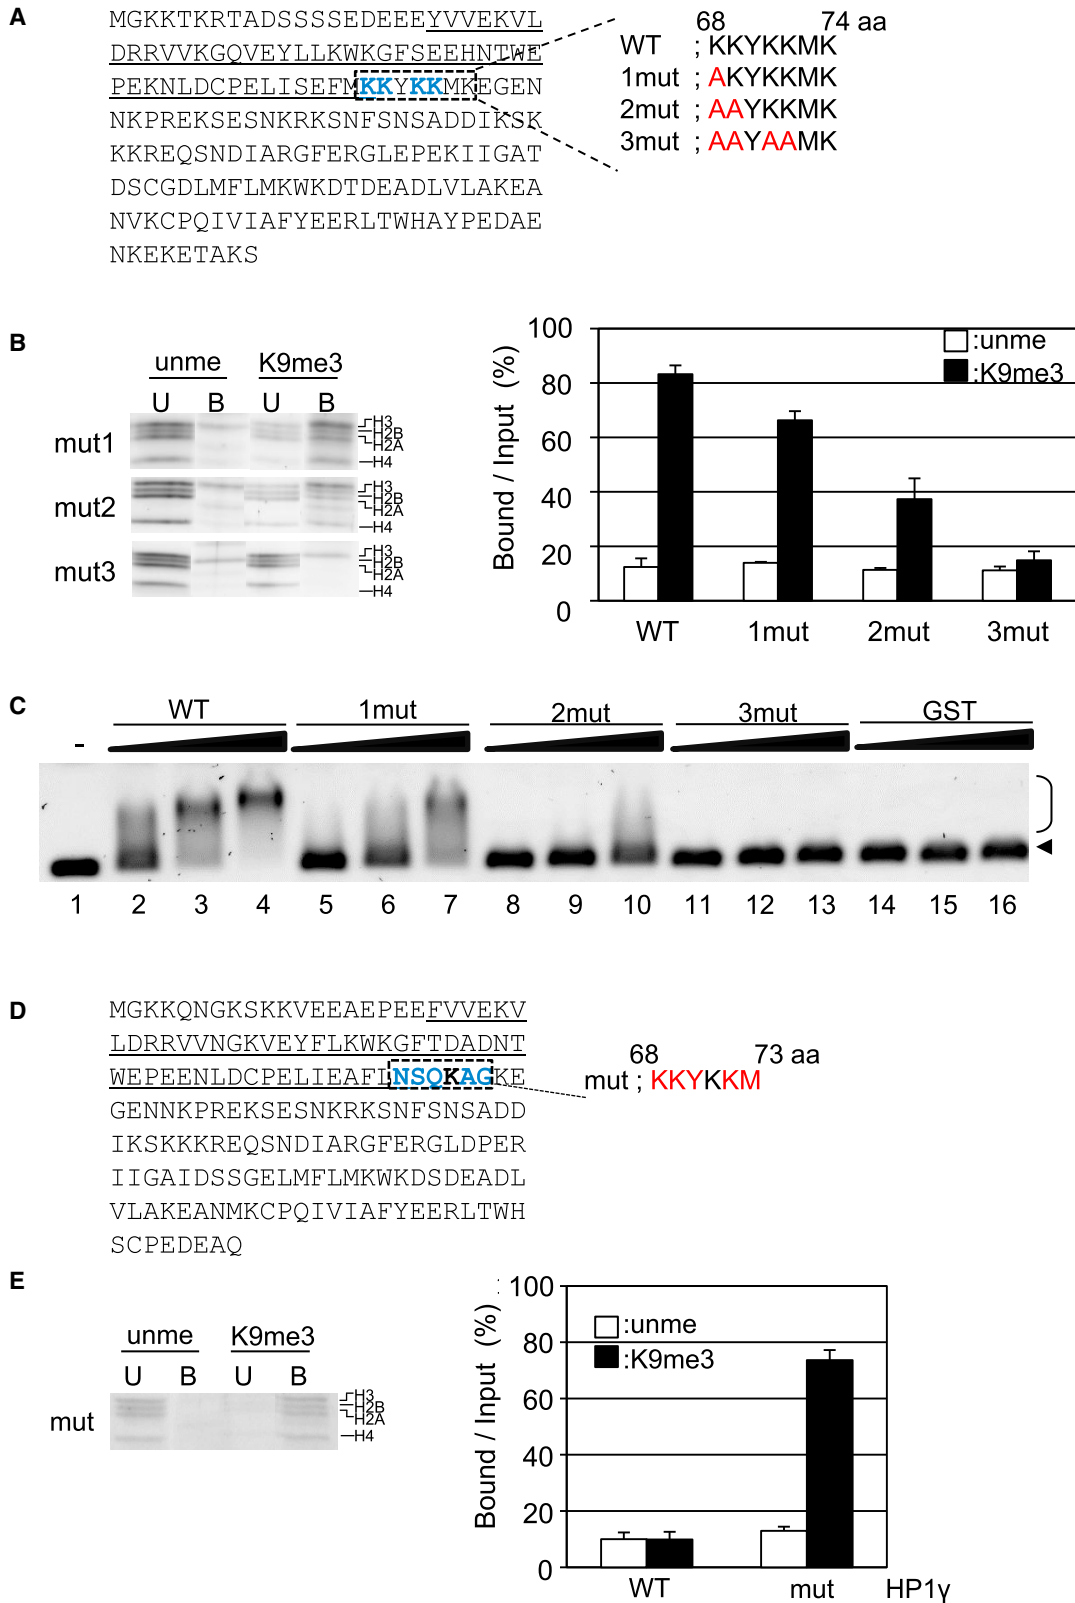

FIGURE 6 Biochemical assays of HP1 $\alpha$  mutations at basic regions in the hinge region. (A) The amino acid sequence of HP1 $\alpha$  is given. The region corresponding to CD is underlined, and the mutation sites (K68, K69, K71, and K72) are shown as bold blue letters. The amino acid sequences of three mutants, 1mut (K68A), 2mut (K68A and K69A), and 3mut (K68A, K69A, K71A, and K72A) are also shown. (B) The binding activities of mutated HP1 $\alpha$  to

(legend continued on next page)

promotes initial targeting of HP1 $\alpha$  to pericentromeric domains and consequently to seeding further HP1 localization, allowing HP1 $\alpha$  to specifically associate with the RNA transcript (73). Accompanying our results, it is suggested that this basic patch could play crucial roles in vivo with multilayered regulations.

### HP1 $\gamma$ cannot bridge the dinucleosome without compacting agents

We have reported that HP1 $\gamma$ , in contrast to HP1 $\alpha$ , does not bind to extended tetranucleosomes with a linker DNA of 20 bp, even when H3K9 is trimethylated, unless additional compacting agents, such as linker histone H1 or Mg<sup>2+</sup>, are added (26). Here, using the dinucleosome with 25-bp linker DNA, we examined whether the same discrimination could be found. Indeed, we found that HP1 $\gamma$  did not bind to the dinucleosomes with a linker DNA length of 25 bp, irrespective of H3K9 methylation status (Fig. 2 B).

Next, we computationally addressed how HP1 $\gamma$  binding to the H3K9 trimethylated dinucleosome is different from that of HP1 $\alpha$ . We conducted the same kind of simulations as above with HP1 $\gamma$  bound on the dinucleosome. Assuming that one CD can transiently bind to the trimethylated H3K9, we set up the simulation so that, in the same way as the case of HP1 $\alpha$ , one CD is bound on the trimethylated K9 in the proximal H3 of nucleosome A, whereas the other CD is free to move. Using the second half of time series data from 10 trajectories, we obtained the histogram of the distances between the free CD and unmethylated H3K9 (Fig. 7, A and B) and the frequency of the approaches within  $2.5 \times 6.6 = 16.5 \text{ \AA}$  of the unmethylated H3K9 (Fig. 7 C). Relative to the same plot for HP1 $\alpha$ , the free CD of the HP1 $\gamma$  did not come as close to the H3K9 as the case of HP1 $\alpha$ . The number of approaches within  $16.5 \text{ \AA}$  was markedly fewer. This was consistent with our previous experimental observation. Without the contact between the free CD and one H3K9, HP1 $\gamma$  transiently bound on the dinucleosome solely by the interaction between one CD and one H3K9 would not maintain this complex stably.

Seeking mechanisms for this less-frequent approach, we performed the same type of interaction analysis of HP1 $\gamma$  with DNA in dinucleosomes as before. In the results depicted in Fig. S10, we find only two segments in the hinge region of HP1 $\gamma$  interacting with DNA, which is in contrast to the three segments of interactions found in HP1 $\alpha$ . Of the

three segments in HP1 $\alpha$ , the first one, KYKKMK at 69–74, is not present in HP1 $\gamma$ , in which the corresponding sequence is NSQKAGK. This less positively charged segment in HP1 $\gamma$  did not interact with DNA significantly (Fig. S10). Thus, less frequent approaches of the free CD in HP1 $\gamma$  to the unmethylated H3K9 can be attributed partly to the absence of basic residues around 69–74 (number based on HP1 $\alpha$ ) and partly to the shorter length of the hinge region than in the case of HP1 $\alpha$ .

To examine the role of KYKKMK at 69–74 in HP1 $\alpha$  further, we constructed a mutant of HP1 $\gamma$  in which NSQKAG at 68–73 was replaced with KKYKKM (Fig. 6 D). The mutated HP1 was expressed and purified as described, and the pull-down assay was performed as described by Materials and Methods (Fig. S4 B). The mutated HP1 $\gamma$  partly recovered the binding activity (Fig. 6 E; Fig. S9), which confirms the importance of this positively charged segment in HP1 $\alpha$  for the binding. Notably, the mutated region does not overlap the regions reported by Mishima et al. (26). Thus, it is suggested that this novel hinge region contributes to the binding together with the following hinge regions.

### How dinucleosome structures are affected by HP1 $\alpha$

An in vitro assay showed that H3K9-trimethylated polynucleosome arrays become more compact upon addition of HP1 (27). Here, we test whether the binding of HP1 $\alpha$  to an H3K9-trimethylated dinucleosome induces compaction or not. We estimated the distance between the centers of two nucleosomes for the three constructs: a dinucleosome without bound HP1, one with one CD of HP1 $\alpha$  bound to the H3K9me3 in nucleosome A, and one with two CDs of HP1 $\alpha$  bound to the H3K9me3 of nucleosomes A and B. Fig. 8 plots the histograms of the nucleosome-nucleosome distances for the three constructs. First, for all the cases, we find bimodal distributions: a population with a shorter distance contains partial docking of the two nucleosomes, and the other population, with a longer distance, corresponds to more extended conformations without internucleosome interactions (representative snapshots depicted in Fig. 8). We see that, when one CD is bound to nucleosome A, the population of the extended conformation increased by  $\sim 20\%$ . For this case, HP1 often is sandwiched by the two nucleosomes, which may stabilize this extended

---

dinucleosomes are shown. The binding activity was examined as described in Fig. 2 A. The activity of WT HP1 $\alpha$  is taken from Fig. 2 B. (C) The DNA binding activities of WT and mutated HP1 $\alpha$  are shown. Naked DNA was incubated without protein (lane 1), with GST-WT HP1 $\alpha$  (WT) (lanes 2–4), 1mut (lanes 5–7), 2mut (lanes 8–10), 3mut (lanes 11–13), or GST (lanes 14–16). To the DNA, 40 (lanes 2, 5, 8, 11, and 14), 80 (lanes 3, 6, 9, 12, and 15), or 160 (lanes 4, 7, 10, 13, and 16) molar excess of protein was added, and a gel retardation assay was performed. The arrowhead and bracket indicate the position of free DNA and shifted DNA, respectively. (D) The sequence of HP1 $\gamma$  is given. The CD is underlined, and the mutation sites are shown as bold blue letters. The mutated sequence is denoted in red. (E) Dinucleosomes reconstituted with unmethylated H3 (unme) or H3K9me3(K9me3) were mixed with the beads, and the binding assay was performed as described in Fig. 2 B. Three unbound (U) and bound (B) fractions were separated and then subjected to SDS-PAGE, and each histone is indicated. The experiments were repeated three times, and the binding activity was summarized in the right panel. The binding activity of GST-HP1 $\gamma$  WT is taken from Fig. 2 B. To see this figure in color, go online.

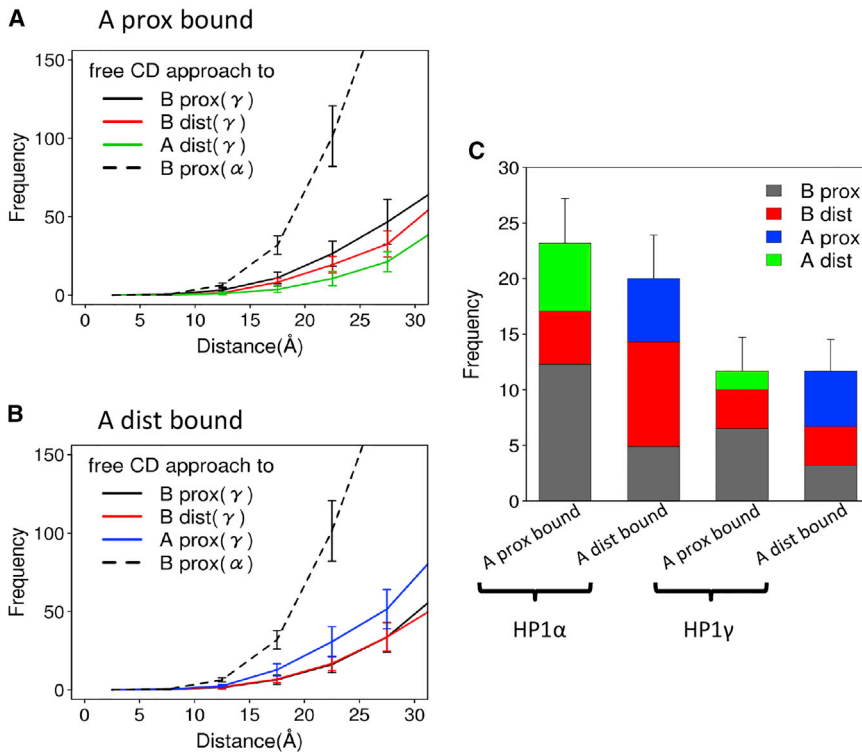

FIGURE 7 Comparison between HP1 $\gamma$  and HP1 $\alpha$  binding to dinucleosome in molecular simulations. (A) The results of HP1 $\gamma$ -dinucleosome simulations in which one CD is bound on the trimethylated K9 of the A-proximal H3 and the other CD is free are shown. The dashed line is the result of HP1 $\alpha$  for comparison. (B) The results when one CD is bound on K9 of the A-distal H3 are given. (C) The number of occurrences in which the distance was below 16.5 Å are given. To see this figure in color, go online.

conformation. For the case in which two CDs of HP1 bridge the two nucleosomes, the population with partial docking of nucleosomes is larger than the case of only one CD bound on nucleosome A and is at a similar level to the case without bound HP1. By the direct bridge by HP1, extended conformations become less probable.

In summary, we did not observe marked compaction of the dinucleosome upon HP1 binding in our computational modeling. At this moment, this is speculative and should be examined in future by biochemical experiments such as the sedimentation assay. As Azzaz et al. reported that human HP1 $\alpha$  dimers promote the interactions in both intra- and internucleosome array (27), HP1 could bridge two chromatin fibers in *trans* to induce higher-order compaction when the concentration of nucleosomes is high.

### Near-atomic structure model of HP1 $\alpha$ bound to dinucleosomes

Finally, from a CG model of HP1 bound on dinucleosomes, we constructed an atomic resolution model and conducted a 30-ns-long atomistic MD simulation (a video is available as Video S2). For simplicity, we used unmodified lysine in H3K9; even with this simple modeling, the histone H3 tail kept bound to HP1 stably in this short simulation, and thus it would not affect the overall structures.

In the atomistic MD simulation, a hinge region of HP1 remains bound to DNA. The final structure of the simulation is shown at Fig. 9 A. HRs of HP1 contact the linker DNA. We

found that lysine and arginine play important role for hinge-DNA interaction. Some of them form hydrogen bonds (Fig. 9 B), and lysine and arginine are generally near DNA (Fig. 9 A); the representative basic residues involved are K106 and R107, which coincide with experimentally identified key residues. The time course of formation of hydrogen bonds between the hinge region and linker DNA is shown in Fig. 9 C. The number of hydrogen bonds gradually increased.

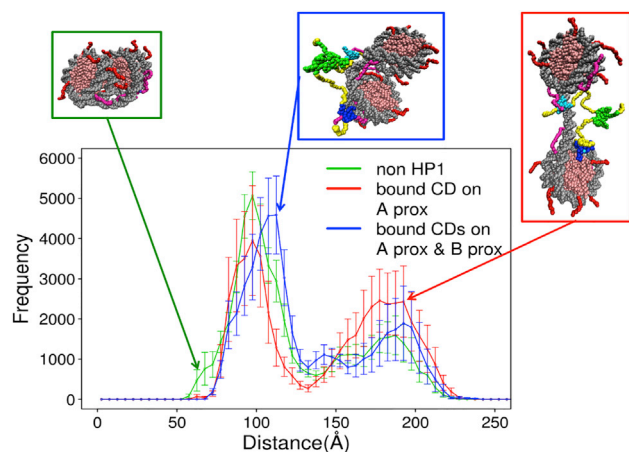

FIGURE 8 Distributions of the distance between centers of two nucleosomes in molecular simulations. Dinucleosome without HP1 (green), dinucleosome with one CD of HP1 bound to A-proximal H3K9 (red), and dinucleosome with two CDs of HP1 bound to two nucleosomes (blue) are shown. To see this figure in color, go online.

A

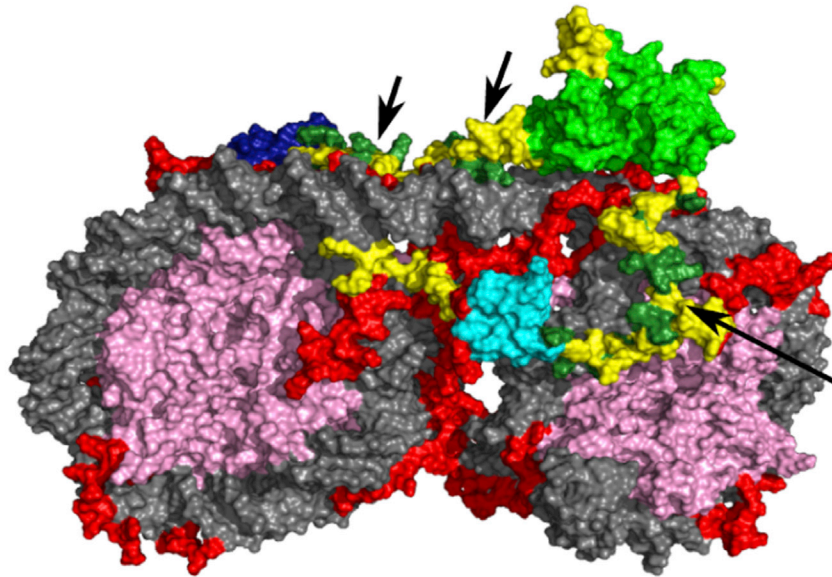

B

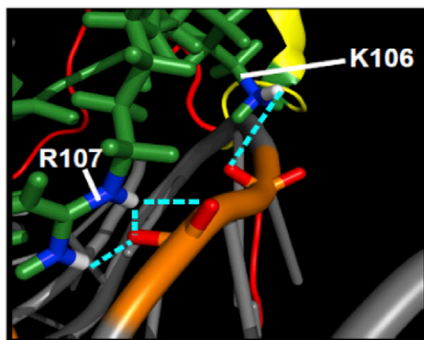

C

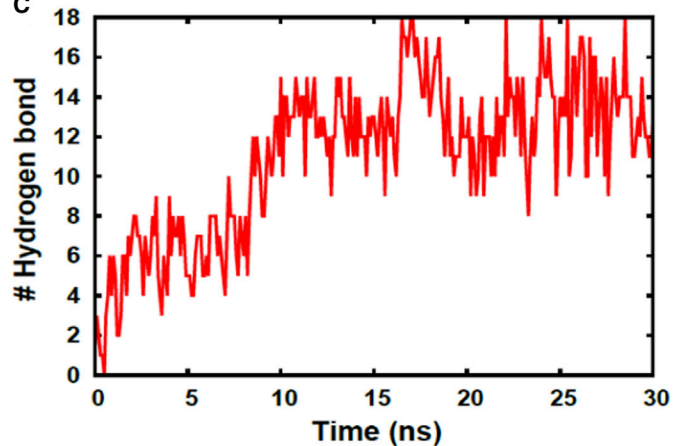

FIGURE 9 Atomistic MD simulation of HP1 binding to dinucleosome system. (A) The final structure of a 30-ns atomistic MD simulation is shown. DNA is in light gray. Histone tails are in red and the other parts of histone proteins in pink. The CD of HP1 is in light green. The CSD of HP1 is in dark blue or cyan. Arginine and lysine in hinge region (K69-G120) of one of HP1 are in dark green. These regions are also indicated by arrows. The other parts of HP1 are in yellow. (B) A close-up view of interactions between HP1 hinge region and DNA is shown. Hydrogen bonds are shown by cyan dotted lines. Molecules are shown by cartoon model, except around the hydrogen bonding part, which is shown by stick model. For visibility, some important atoms are colored differently. Oxygen atoms are in red and nitrogen in blue. Hydrogen atoms are in white and phosphorus in orange. (C) The number of hydrogen bonds between HP1 hinge region and DNA is given. The hinge region we analyzed is one at a central and upper part in (A), whose arginine and lysine are colored by dark green. To see this figure in color, go online.

To sum up, HP1 $\alpha$ -dinucleosome structure led to electrostatic contact between the hinge region and the linker DNA. These results are consistent with the CG simulation.

## DISCUSSION

In this study, employing a hybrid approach of multiscale computational modeling and biochemical experimental assays, we provide near-atomic structural models for HP1 binding to H3K9me<sub>3</sub>-containing dinucleosome. The previous biochemical assays suggested that the fundamental binding unit of the dimeric HP1 is not a mononucleosome, but a dinucleosome. Consistent with this, using CG molecular simulations, we found that the dimeric HP1 $\alpha$  tends to

bind two H3K9me<sub>3</sub> that are in different nucleosomes, thus bridging two nucleosomes. By computational analysis, we found that this tendency was caused by electrostatic attractions between some positively charged residues in the disordered hinge region of HP1 and the linker DNA. By reverse-mapping from the CG model, we obtained a fully atomic model of the HP1 dimer bound to dinucleosome, showing several hydrogen bonds between the hinge regions and DNA. Biochemical mutation assays confirmed these site-specific interactions. Moreover, consistent with the previous experiment, our computational analysis clarified that HP1 $\gamma$  does not easily bridge two nucleosomes in extended conformations because of the lack of one basic segment in the hinge region and its shorter hinge region.

For the compaction of polynucleosome arrays with more than two nucleosomes, some population of two nonadjacent nucleosomes must be directly bridged by HP1, for which the compaction mechanism would be similar to that seen in the case with two CDs bound to two neighboring nucleosomes on a DNA double strand.

Recently, it has been reported that the phosphorylation on HP1 modulates its binding activity. Phosphorylation of HP1 $\gamma$  by PKA impairs its silencing activity (12), and phosphorylation in the N-terminal region of HP1 $\alpha$  by casein kinase2 is crucial for the heterochromatin localization (74) and for its binding specificity (25). In contrast, HP1 $\beta$  phosphorylated at either S89 or S175 does not show compromised chromatin binding activity (75). For analyzing the effect of the posttranslational modification on the HP1 binding, the modeling described in this study could be useful, and this type of study will further elucidate its molecular mechanisms.

As the study was in the review process, Machida et al. reported the structure model of HP1 in complex with the H3K9 trimethylated dinucleosome obtained by cryogenic electron microscopy (cryoEM) (76). In the cryoEM model, homodimeric HP1 $\alpha$ , HP1 $\beta$ , and HP1 $\gamma$  all bridge the two H3K9 trimethylated nucleosomes in the same way as we show here for HP1 $\alpha$ . In the current work, however, HP1 $\gamma$  did not interact with the extended H3K9 trimethylated dinucleosome significantly. Moreover, the cryoEM structure model shows that the HP1 does not directly interact with the linker DNA, which is in sharp contrast to our model here. Although the molecular systems used and preparations in the two studies are similar, they are significantly different as well; notably, the length of the linker DNA is 15 bp in the cryoEM study and 25 bp in the current study. The cryoEM structure models do not identify all the domains in the HP1 dimer, which makes a detailed argument difficult. Possibly a short linker DNA enables the dimeric HP1 to bridge the two nucleosomes without interacting with the linker DNA. Further studies are required to figure out the effect of the linker DNA length on the interaction of HP1.

The current simulations revealed the dynamic and fragile nature of the HP1 $\alpha$  dimer that bridges the dinucleosome. This dynamic view is consistent with a recent report that also appeared during the review process of this article (77).

## SUPPORTING MATERIAL

Supporting Materials and Methods, twelve figures, and two videos are available at [http://www.biophysj.org/biophysj/supplemental/S0006-3495\(18\)30394-1](http://www.biophysj.org/biophysj/supplemental/S0006-3495(18)30394-1).

## AUTHOR CONTRIBUTIONS

S.W., Y.M., M.S., and I.S. performed research and analyzed data. I.S. and S.T. designed the research and wrote the manuscript. M.S. contributed analytic tools.

## ACKNOWLEDGMENTS

This work was supported by the Ministry of Education, Culture, Sports, Science, and Technology Grants-in-Aid for Scientific Research (grants 15H01351, 16H01303, 25118509, 25251019, 26104517, and 15K14418); the Ministry of Education, Culture, Sports, Science, and Technology Strategic Programs for Innovative Research “Supercomputational Life Science”; and the Japan Agency for Medical Research and Development.

## REFERENCES

- Eissenberg, J. C., and S. C. Elgin. 2014. HP1 $\alpha$ : a structural chromosomal protein regulating transcription. *Trends Genet.* 30:103–110.
- Nishibuchi, G., and J. Nakayama. 2014. Biochemical and structural properties of heterochromatin protein 1: understanding its role in chromatin assembly. *J. Biochem.* 156:11–20.
- Fanti, L., and S. Pimpinelli. 2008. HP1: a functionally multifaceted protein. *Curr. Opin. Genet. Dev.* 18:169–174.
- Kwon, S. H., and J. L. Workman. 2008. The heterochromatin protein 1 (HP1) family: put away a bias toward HP1. *Mol. Cells.* 26:217–227.
- Canzio, D., A. Larson, and G. J. Narlikar. 2014. Mechanisms of functional promiscuity by HP1 proteins. *Trends Cell Biol.* 24:377–386.
- Hiragami-Hamada, K., S. Soeroes, ..., W. Fischle. 2016. Dynamic and flexible H3K9me3 bridging via HP1 $\beta$  dimerization establishes a plastic state of condensed chromatin. *Nat. Commun.* 7:11310.
- Eissenberg, J. C., and S. C. Elgin. 2000. The HP1 protein family: getting a grip on chromatin. *Curr. Opin. Genet. Dev.* 10:204–210.
- Grewal, S. I., and S. Jia. 2007. Heterochromatin revisited. *Nat. Rev. Genet.* 8:35–46.
- Dihazi, G. H., O. Jahn, ..., H. Dihazi. 2015. Proteomic analysis of embryonic kidney development: heterochromatin proteins as epigenetic regulators of nephrogenesis. *Sci. Rep.* 5:13951.
- Takada, Y., C. Naruse, ..., H. Koseki. 2011. HP1 $\gamma$  links histone methylation marks to meiotic synapsis in mice. *Development.* 138:4207–4217.
- Aucott, R., J. Bullwinkel, ..., P. B. Singh. 2008. HP1-beta is required for development of the cerebral neocortex and neuromuscular junctions. *J. Cell Biol.* 183:597–606.
- Lomber, G., D. Bensi, ..., R. Urrutia. 2006. Evidence for the existence of an HP1-mediated subcode within the histone code. *Nat. Cell Biol.* 8:407–415.
- Vakoc, C. R., S. A. Mandat, ..., G. A. Blobel. 2005. Histone H3 lysine 9 methylation and HP1 $\gamma$  are associated with transcription elongation through mammalian chromatin. *Mol. Cell.* 19:381–391.
- Bannister, A. J., P. Zegerman, ..., T. Kouzarides. 2001. Selective recognition of methylated lysine 9 on histone H3 by the HP1 chromatin domain. *Nature.* 410:120–124.
- Lachner, M., D. O’Carroll, ..., T. Jenuwein. 2001. Methylation of histone H3 lysine 9 creates a binding site for HP1 proteins. *Nature.* 410:116–120.
- Ye, Q., I. Callebaut, ..., H. J. Worman. 1997. Domain-specific interactions of human HP1-type chromodomain proteins and inner nuclear membrane protein LBR. *J. Biol. Chem.* 272:14983–14989.
- Nielsen, A. L., M. Oulad-Abdelghani, ..., R. Losson. 2001. Heterochromatin formation in mammalian cells: interaction between histones and HP1 proteins. *Mol. Cell.* 7:729–739.
- Canzio, D., E. Y. Chang, ..., B. Al-Sady. 2011. Chromodomain-mediated oligomerization of HP1 suggests a nucleosome-bridging mechanism for heterochromatin assembly. *Mol. Cell.* 41:67–81.
- Yamada, T., R. Fukuda, ..., K. Sugimoto. 1999. Functional domain structure of human heterochromatin protein HP1(Hsalpha): involvement of internal DNA-binding and C-terminal self-association domains in the formation of discrete dots in interphase nuclei. *J. Biochem.* 125:832–837.

20. Munari, F., S. Soeroes, ..., M. Zweckstetter. 2012. Methylation of lysine 9 in histone H3 directs alternative modes of highly dynamic interaction of heterochromatin protein hHP1 $\beta$  with the nucleosome. *J. Biol. Chem.* 287:33756–33765.
21. Lechner, M. S., D. C. Schultz, ..., F. J. Rauscher, III. 2005. The mammalian heterochromatin protein 1 binds diverse nuclear proteins through a common motif that targets the chromoshadow domain. *Biochem. Biophys. Res. Commun.* 331:929–937.
22. Maison, C., and G. Almouzni. 2004. HP1 and the dynamics of heterochromatin maintenance. *Nat. Rev. Mol. Cell Biol.* 5:296–304.
23. Meehan, R. R., C. F. Kao, and S. Pennings. 2003. HP1 binding to native chromatin in vitro is determined by the hinge region and not by the chromodomain. *EMBO J.* 22:3164–3174.
24. Mishima, Y., M. Watanabe, ..., I. Suetake. 2013. Hinge and chromoshadow of HP1 $\alpha$  participate in recognition of K9 methylated histone H3 in nucleosomes. *J. Mol. Biol.* 425:54–70.
25. Nishibuchi, G., S. Machida, ..., J. Nakayama. 2014. N-terminal phosphorylation of HP1 $\alpha$  increases its nucleosome-binding specificity. *Nucleic Acids Res.* 42:12498–12511.
26. Mishima, Y., C. D. Jayasinghe, ..., I. Suetake. 2015. Nucleosome compaction facilitates HP1 $\gamma$  binding to methylated H3K9. *Nucleic Acids Res.* 43:10200–10212.
27. Azzaz, A. M., M. W. Vitalini, ..., M. A. Shogren-Knaak. 2014. Human heterochromatin protein 1 $\alpha$  promotes nucleosome associations that drive chromatin condensation. *J. Biol. Chem.* 289:6850–6861.
28. Kilic, S., A. L. Bachmann, ..., B. Fierz. 2015. Multivalency governs HP1 $\alpha$  association dynamics with the silent chromatin state. *Nat. Commun.* 6:7313.
29. Bryan, L. C., D. R. Weilandt, ..., B. Fierz. 2017. Single-molecule kinetic analysis of HP1-chromatin binding reveals a dynamic network of histone modification and DNA interactions. *Nucleic Acids Res.* 45:10504–10517.
30. Wedemann, G., and J. Langowski. 2002. Computer simulation of the 30-nanometer chromatin fiber. *Biophys. J.* 82:2847–2859.
31. Arya, G., and T. Schlick. 2006. Role of histone tails in chromatin folding revealed by a mesoscopic oligonucleosome model. *Proc. Natl. Acad. Sci. USA.* 103:16236–16241.
32. Grigoryev, S. A., G. Arya, ..., T. Schlick. 2009. Evidence for heteromorphic chromatin fibers from analysis of nucleosome interactions. *Proc. Natl. Acad. Sci. USA.* 106:13317–13322.
33. Ozer, G., A. Luque, and T. Schlick. 2015. The chromatin fiber: multiscale problems and approaches. *Curr. Opin. Struct. Biol.* 31:124–139.
34. Luque, A., R. Collepardo-Guevara, ..., T. Schlick. 2014. Dynamic condensation of linker histone C-terminal domain regulates chromatin structure. *Nucleic Acids Res.* 42:7553–7560.
35. Perišić, O., and T. Schlick. 2017. Dependence of the linker histone and chromatin condensation on the nucleosome environment. *J. Phys. Chem. B.* 121:7823–7832.
36. Voltz, K., J. Trylska, ..., J. Smith. 2008. Coarse-grained force field for the nucleosome from self-consistent multiscale. *J. Comput. Chem.* 29:1429–1439.
37. Voltz, K., J. Trylska, ..., J. Langowski. 2012. Unwrapping of nucleosomal DNA ends: a multiscale molecular dynamics study. *Biophys. J.* 102:849–858.
38. Collepardo-Guevara, R., G. Portella, ..., M. Orozco. 2015. Chromatin unfolding by epigenetic modifications explained by dramatic impairment of internucleosome interactions: a multiscale computational study. *J. Am. Chem. Soc.* 137:10205–10215.
39. Dans, P. D., J. Walther, ..., M. Orozco. 2016. Multiscale simulation of DNA. *Curr. Opin. Struct. Biol.* 37:29–45.
40. Winogradoff, D., I. Echeverria, ..., G. A. Papoian. 2015. The acetylation landscape of the H4 histone tail: disentangling the interplay between the specific and cumulative effects. *J. Am. Chem. Soc.* 137:6245–6253.
41. Zhang, B., W. Zheng, ..., P. G. Wolynes. 2016. Exploring the free energy landscape of nucleosomes. *J. Am. Chem. Soc.* 138:8126–8133.
42. Takeshima, H., I. Suetake, ..., S. Tajima. 2006. Distinct DNA methylation activity of Dnmt3a and Dnmt3b towards naked and nucleosomal DNA. *J. Biochem.* 139:503–515.
43. Luger, K., T. J. Rechsteiner, and T. J. Richmond. 1999. Preparation of nucleosome core particle from recombinant histones. *Methods Enzymol.* 304:3–19.
44. Davey, C. A., D. F. Sargent, ..., T. J. Richmond. 2002. Solvent mediated interactions in the structure of the nucleosome core particle at 1.9 Å resolution. *J. Mol. Biol.* 319:1097–1113.
45. Kaustov, L., H. Ouyang, ..., C. H. Arrowsmith. 2011. Recognition and specificity determinants of the human cbx chromodomains. *J. Biol. Chem.* 286:521–529.
46. Li, W., T. Terakawa, ..., S. Takada. 2012. Energy landscape and multi-route folding of topologically complex proteins adenylate kinase and 2ouf-knot. *Proc. Natl. Acad. Sci. USA.* 109:17789–17794.
47. Li, W., W. Wang, and S. Takada. 2014. Energy landscape views for interplays among folding, binding, and allostery of calmodulin domains. *Proc. Natl. Acad. Sci. USA.* 111:10550–10555.
48. Sambriski, E. J., D. C. Schwartz, and J. J. de Pablo. 2009. A mesoscale model of DNA and its renaturation. *Biophys. J.* 96:1675–1690.
49. Kenzaki, H., and S. Takada. 2015. Partial unwrapping and histone tail dynamics in nucleosome revealed by coarse-grained molecular simulations. *PLoS Comput. Biol.* 11:e1004443.
50. Kenzaki, H., N. Koga, ..., S. Takada. 2011. CafeMol: a coarse-grained biomolecular simulator for simulating proteins at work. *J. Chem. Theory Comput.* 7:1979–1989.
51. Kelley, L. A., S. Mezulis, ..., M. J. Sternberg. 2015. The Phyre2 web portal for protein modeling, prediction and analysis. *Nat. Protoc.* 10:845–858.
52. Case, D. A., T. A. Darden, ..., P. A. Kollman. 2012. AMBER 13. University of California, San Francisco, CA.
53. Macke, T. J., and D. A. Case. 1998. Modeling unusual nucleic acid structures. In *Molecular Modeling of Nucleic Acids*. N. B. Leontis and J. SantaLucia, eds. ACS Symposium Series, Vol. 682, pp. 379–393.
54. Abraham, M. J., T. Murtola, ..., E. Lindahl. 2015. Gromacs: high performance molecular simulations through multi-level parallelism from laptops to supercomputers. *SoftwareX.* 1:19–25.
55. Páll, S., M. J. Abraham, ..., E. Lindahl. 2015. Tackling exascale software challenges in molecular dynamics simulations with GROMACS. In *Solving Software Challenges for Exascale*, Lecture Notes in Computer Science. S. Markidis and E. Laure, eds. Springer, Vol. 8759, pp. 3–27.
56. Bondi, A. 1964. van der Waals volumes and radii. *J. Phys. Chem.* 68:441–451.
57. Guy, A. T., T. J. Piggot, and S. Khalid. 2012. Single-stranded DNA within nanopores: conformational dynamics and implications for sequencing: a molecular dynamics simulation study. *Biophys. J.* 103:1028–1036.
58. Hornak, V., R. Abel, ..., C. Simmerling. 2006. Comparison of multiple Amber force fields and development of improved protein backbone parameters. *Proteins.* 65:712–725.
59. Sorin, E. J., and V. S. Pande. 2005. Exploring the helix-coil transition via all-atom equilibrium ensemble simulations. *Biophys. J.* 88:2472–2493.
60. Pérez, A., I. Marchán, ..., M. Orozco. 2007. Refinement of the AMBER force field for nucleic acids: improving the description of  $\alpha/\gamma$  conformers. *Biophys. J.* 92:3817–3829.
61. Jorgensen, W. L., J. Chandrasekhar, ..., M. L. Klein. 1983. Comparison of simple potential functions for simulating liquid water. *J. Chem. Phys.* 79:926–935.
62. Essmann, U., L. Perera, ..., L. G. Pedersen. 1995. A smooth particle mesh Ewald method. *J. Chem. Phys.* 103:8577–8593.
63. Hess, B., H. Bekker, ..., J. Fraaije. 1997. LINCS: a linear constraint solver for molecular simulations. *J. Comput. Chem.* 18:1463–1472.

64. Miyamoto, S., and P. A. Kollman. 1992. SETTLE - an analytical version of the shake and rattle algorithm for rigid water models. *J. Comput. Chem.* 13:952–962.
65. Bussi, G., D. Donadio, and M. Parrinello. 2007. Canonical sampling through velocity rescaling. *J. Chem. Phys.* 126:014101.
66. Parrinello, M., and A. Rahman. 1981. Polymorphic transitions in single-crystals - a new molecular-dynamics method. *J. Appl. Phys.* 52:7182–7190.
67. Li, W., P. G. Wolynes, and S. Takada. 2011. Frustration, specific sequence dependence, and nonlinearity in large-amplitude fluctuations of allosteric proteins. *Proc. Natl. Acad. Sci. USA.* 108:3504–3509.
68. Takada, S., R. Kanada, ..., H. Kanzaki. 2015. Modeling structural dynamics of biomolecular complexes by coarse-grained molecular simulations. *Acc. Chem. Res.* 48:3026–3035.
69. Terakawa, T., and S. Takada. 2011. Multiscale ensemble modeling of intrinsically disordered proteins: p53 N-terminal domain. *Biophys. J.* 101:1450–1458.
70. Terakawa, T., H. Kanzaki, and S. Takada. 2012. p53 searches on DNA by rotation-uncoupled sliding at C-terminal tails and restricted hopping of core domains. *J. Am. Chem. Soc.* 134:14555–14562.
71. Muchardt, C., M. Guilleme, ..., M. Yaniv. 2002. Coordinated methyl and RNA binding is required for heterochromatin localization of mammalian HP1 $\alpha$ . *EMBO Rep.* 3:975–981.
72. Shimojo, H., A. Kawaguchi, ..., Y. Nishimura. 2016. Extended string-like binding of the phosphorylated HP1 $\alpha$  N-terminal tail to the lysine 9-methylated histone H3 tail. *Sci. Rep.* 6:22527.
73. Maison, C., D. Bailly, ..., G. Almouzni. 2011. SUMOylation promotes de novo targeting of HP1 $\alpha$  to pericentric heterochromatin. *Nat. Genet.* 43:220–227.
74. Hiragami-Hamada, K., K. Shinmyozu, ..., J. Nakayama. 2011. N-terminal phosphorylation of HP1 $\alpha$  promotes its chromatin binding. *Mol. Cell. Biol.* 31:1186–1200.
75. Munari, F., M. J. Gajda, ..., M. Zweckstetter. 2014. Characterization of the effects of phosphorylation by CK2 on the structure and binding properties of human HP1 $\beta$ . *FEBS Lett.* 588:1094–1099.
76. Machida, S., Y. Takizawa, ..., H. Kurumizaka. 2018. Structural basis of heterochromatin formation by human HP1. *Mol. Cell.* 69:385–397.e8.
77. Kilic, S., S. Felekyan, ..., B. Fierz. 2018. Single-molecule FRET reveals multiscale chromatin dynamics modulated by HP1 $\alpha$ . *Nat. Commun.* 9:235.



**Biophysical Journal, Volume 114**

**Supplemental Information**

**Interactions of HP1 Bound to H3K9me3 Dinucleosome by Molecular Simulations and Biochemical Assays**

**Shuhei Watanabe, Yuichi Mishima, Masahiro Shimizu, Isao Suetake, and Shoji Takada**

**Supporting Figures for  
Interactions of HP1 bound to H3K9m33 di-nucleosome by  
molecular simulations and biochemical assays**

**S. Watanabe, Y. Mishima, M. Shimizu, I. Suetake<sup>\*</sup>, S. Takada<sup>\*</sup>**

The authors wish it to be known that, in their opinion, the first two authors should be regarded as joint first authors.

## **Supplementary Information**

### *Expression vectors*

For expressing HP1  $\alpha$  with GST and 3x Flag tag at N-terminus, cDNA corresponding to 3x repeated Flag tag was inserted between GST and HP1  $\alpha$  in pGEX6P-HP1 $\alpha$  (Materials and Methods), in frame.

### *Purification of F- HP1 $\alpha$*

GST-Flag-tagged wild type and 3mut HP $\alpha$   $\alpha$  was expressed and purified with glutathione beads, as described in Materials and Methods. To obtain F-HP1 $\alpha$ , purified GST-Flag-HP1 $\alpha$  was treated with Turbo3C (Wako, Japan), and then further purified with HiTrapQ, as described in Materials and Methods.

### *Pulldown assay*

F-HP1 $\alpha$  (80pmol) was mixed to 10ul of anti-Flag M2 affinity gel (Sigma), and washed with binding buffer, and then the binding reaction was performed using di-nucleosomes with 25 bp DNA linker, as described in Materials and Methods. As the affinity beads contained proteins of which molecular weight is similar to histones, the reaction mixture was separated in 18% acrylamide gels and proteins were transferred onto nitro cellulose membrane and then histone H4 was detected by using primary antibodies (Abcam, ab10158) and HRP conjugated secondary antibodies (Thermo Fisher; #A27036). The bands were visualized with Western BLoT Quant HRP Substrate kit (Takara, Japan) and LAS1000 (Fuji Film, Japan). The density of band was quantified by using software, Image Gauge (Fuji Film, Japan).

Supplementary Figure

ATCGACGACA GTACTCGCCG CCCTGGAGAA TCCCGGTGCC GAGGCCGCTC  
AATTGGTCGT AGACAGCTCT AGCACCGCTT AAACGCACGT ACGCGCTGTC  
CCCCGCGTTT TAACCGCCAA GGGATTACT CCCTAGTCTC CAGGCACGTG  
TCAGATATAT ACATCCTGTG CACGTAAGAG TACTACTCGC CGCCCTGGAG  
AATCCCGGTG CCGAGGCCG TCAATTGGTC GTAGACAGCT CTAGCACCGC  
TTAAACGCAC GTACGCGCTG TCCCCGCGT TTTAACCGCC AAGGGGATTA  
CTCCCTAGTC TCCAGGCACG TGTCAGATAT ATACATCCTG TGCACGTAAG  
TACTCCGTCT TCGAT

Figure S1. The DNA sequence used for the reconstitution of di-nucleosomes. The expected positions of histone octamers are shown as underlines. The linker DNA between nucleosomes is 25 bp.

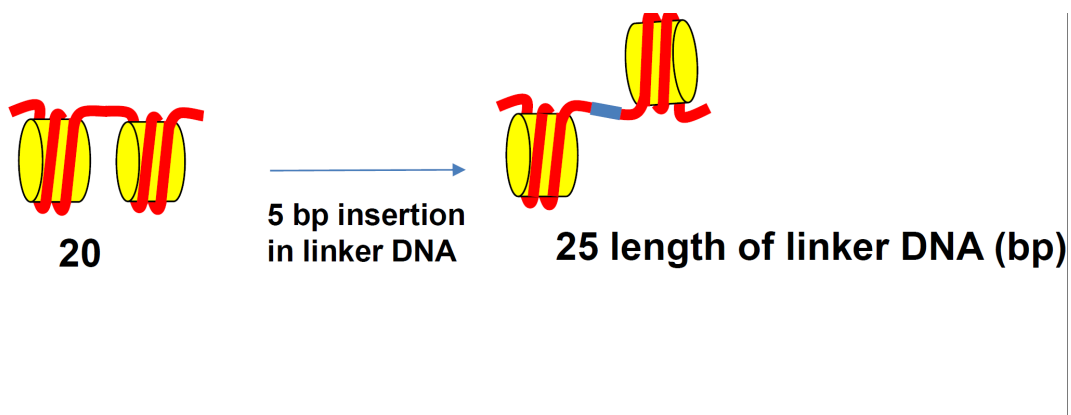

Figure S2. Schematic illustration of rotational positioning change of di-nucleosomes by 5 bp increment of linker DNA.

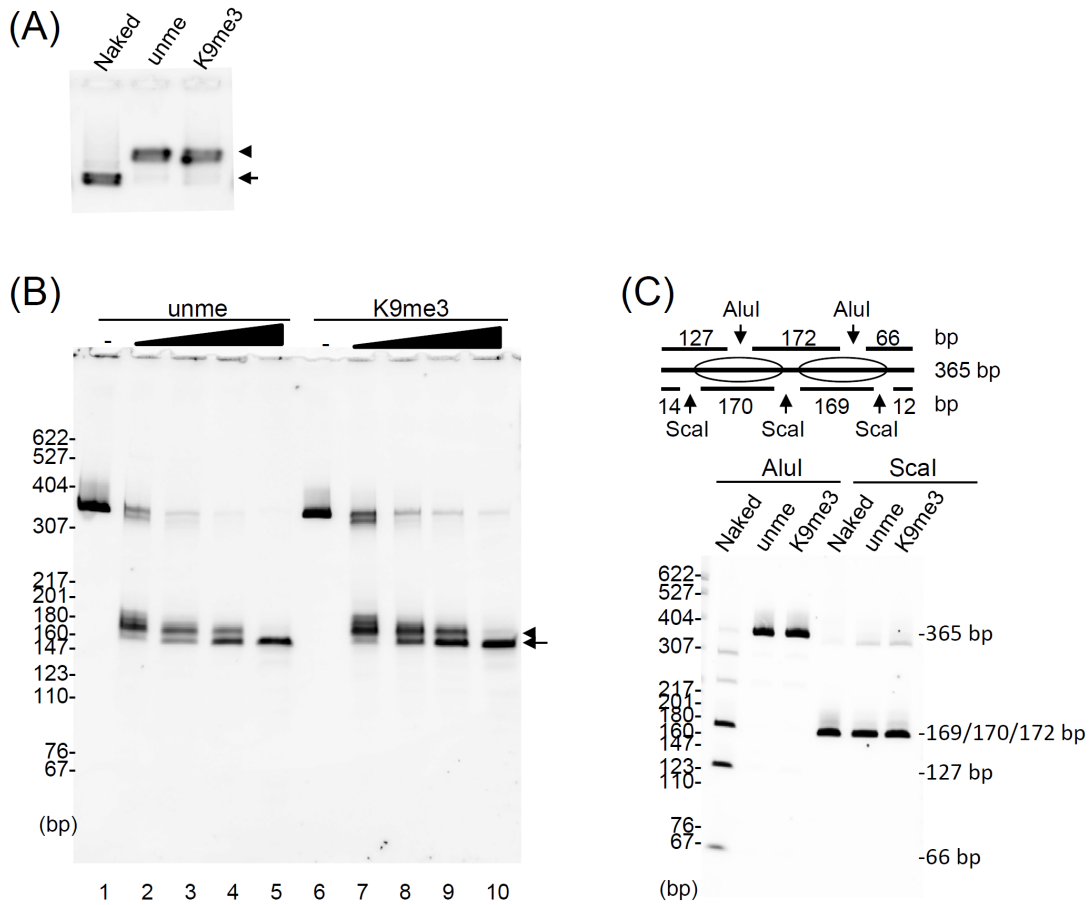

**Figure S3. Properties of the reconstituted di-nucleosomes.** A) Agarose gel electrophoresis of naked and reconstituted di-nucleosomes. Di-nucleosomes reconstituted with unmethylated H3 (unme) or H3K9me3 (K9me3) and naked DNA (naked) were electrophoresed in a 0.7% agarose gel. Reconstituted nucleosome and free DNA were indicated with arrowhead and arrow, respectively. B) MNase analysis for nucleosome assembly. Reconstituted di-nucleosomes were treated with MNase (2.6 U/ml for lanes 2 and 7; 8.8 U/ml for lanes 3 and 8; 26.5 U/ml for lanes 4 and 9; and 88.4 U/ml for lanes 5 and 10), or without MNase (lanes 1 and 6). DNA was separated in a 5% native polyacrylamide gel. Size markers (bp) are indicated at left of the gel. The positions of the 160 bp (arrowhead) and 146 bp (arrow) bands protected from MNase digestion are indicated. C) Restriction enzyme susceptibility of reconstituted di-nucleosomes. The expected positions of histone octamers (ellipses) and the length of digested DNA are shown (upper panel). ScaI sites are located at outside of the expected positions of nucleosomes, while AluI sites are at the region the core particles sit. Naked DNA or reconstituted were digested with either AluI or ScaI, and separated in a 5% native

polyacrylamide gel (lower panel).

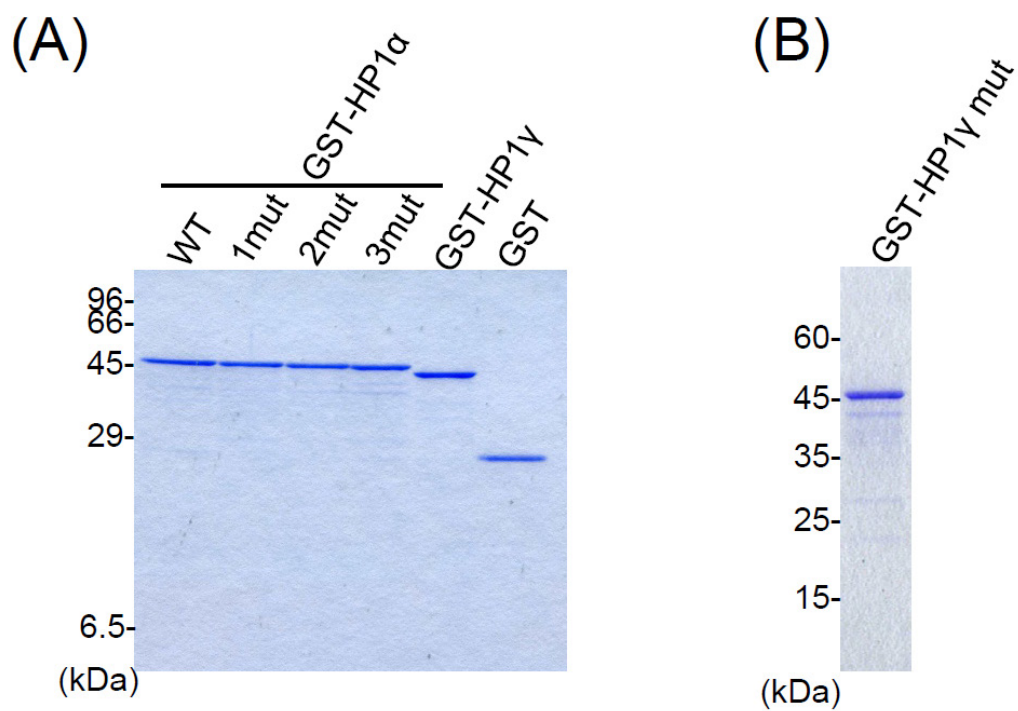

**Figure S4. SDS-PAGE of purified HP1.** A) One  $\mu$ g of proteins (GST-HP1 $\alpha$  (wild type (wt), 1mut, 2mut and 3mut), GST-HP1 $\gamma$ , and GST) was separated in a 12% SDS-polyacrylamide gel, and stained with CBB. Size markers are indicated at the left of the gel. B) One  $\mu$ g of purified GST-HP1 $\gamma$  mutant (N68K, S69K, Q70Y, A72K, and G73M) was separated in a 5-20% gradient acrylamide gel, and stained with CBB. Size markers are indicated at the left of the gel.

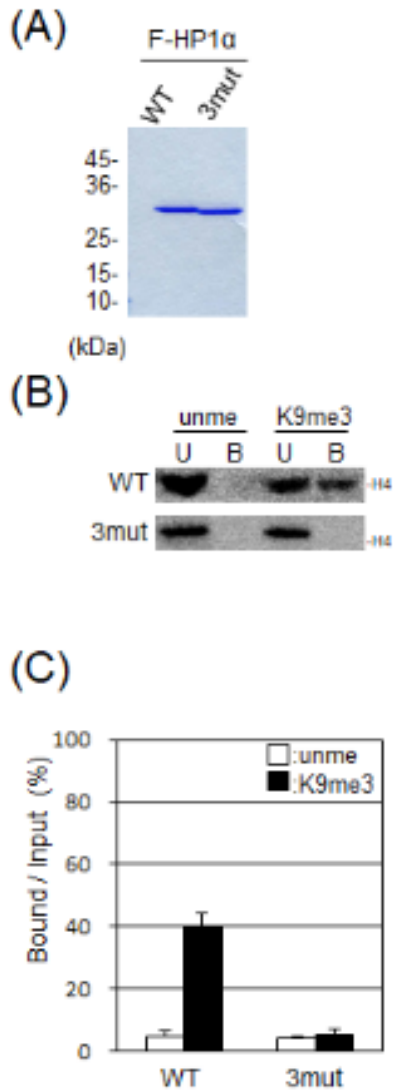

**Supplementary Fig S5. The interaction between F-HP1 $\alpha$  and di-nucleosomes**

(A) Purified F-HP1 $\alpha$ . Wild type F-HP1 $\alpha$  (lane 1) and F-HP1 $\alpha$ -3mut (lane 2) (1  $\mu$ g) were separated with a 5-20% gradient acrylamide gel, and the bands were detected with CBB. Molecular weight markers are indicated at the left of the gel. An arrow indicates F-HP1 $\alpha$ . (B) Interaction between F-HP1 $\alpha$  (WT or 3mut) and di-nucleosomes. After the binding reaction using anti-Flag matrices, unbound (U) and bound (B) fractions are obtained. Histone H4 was detected by western blotting. A representative result is shown. Average  $\pm$  SD (intensity of bound H4/(that of bound + unbound H4) (%)) of the binding activity was calculated from three independent experiments, and shown in panel C.



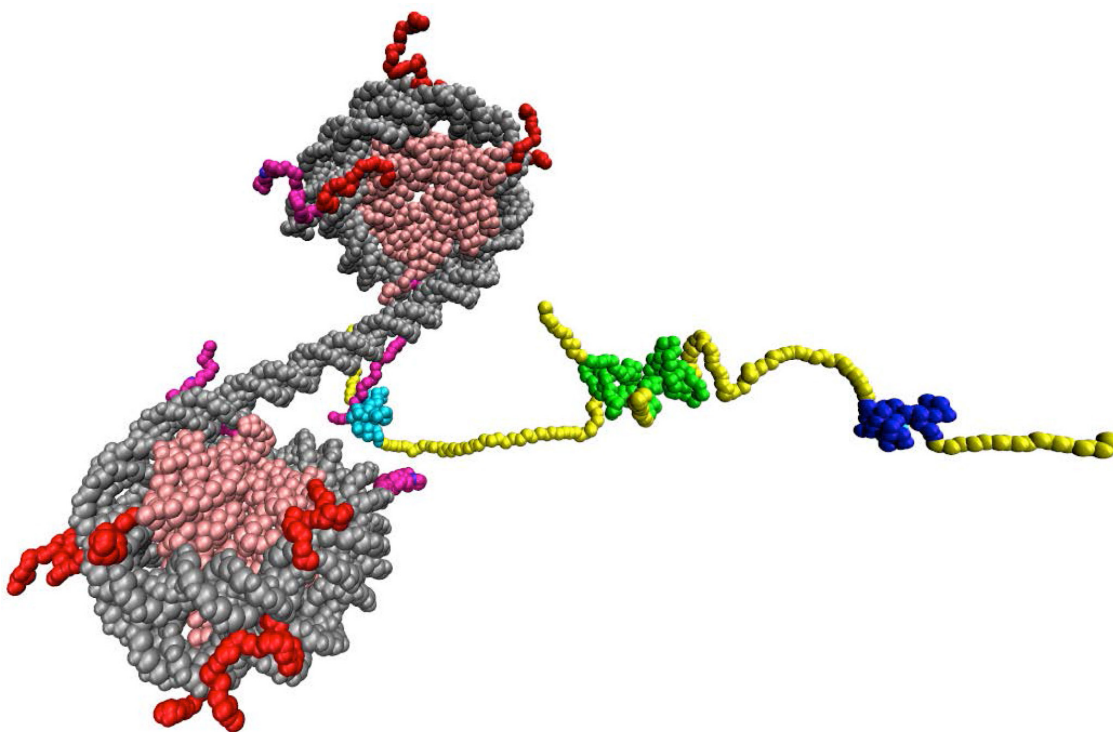

**Figure S6.** An example of initial structure for molecular simulations for “A prox bound”. The color usage is the same as that of Fig.3.

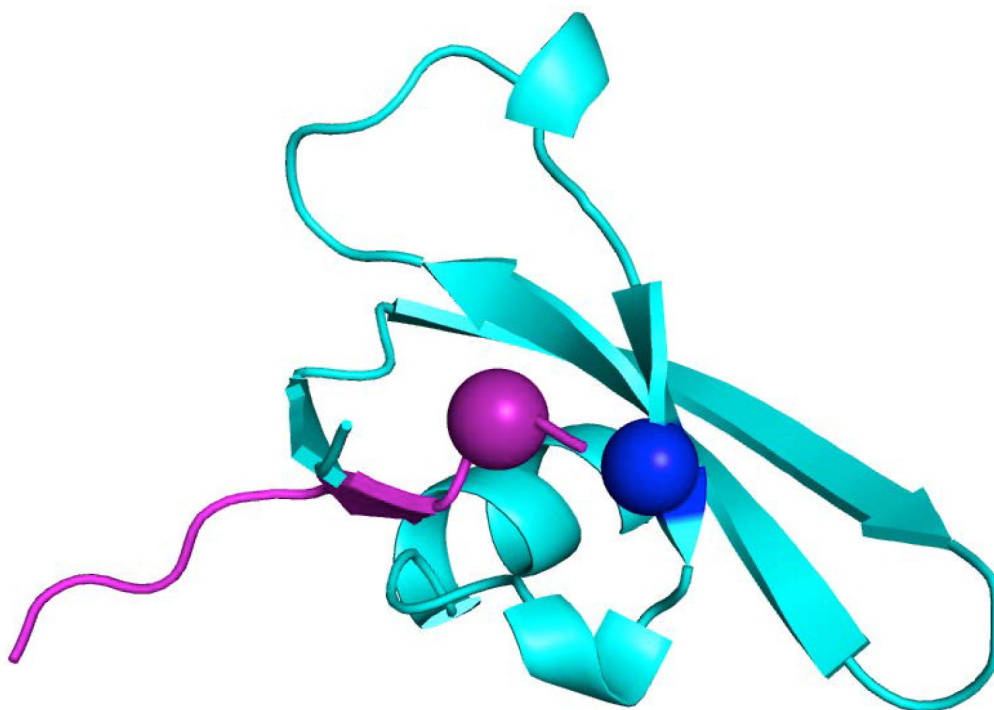

**Figure S7. The crystal structure of the CD domain complex with a H3K9me3-containing peptide.** The C $\alpha$  positions of H3K9 and HP1 Glu52 are shown in purple and blue spheres. The distance between the two C $\alpha$  atoms was 6.6Å. The structure is from 3FDT.

## A dist bound

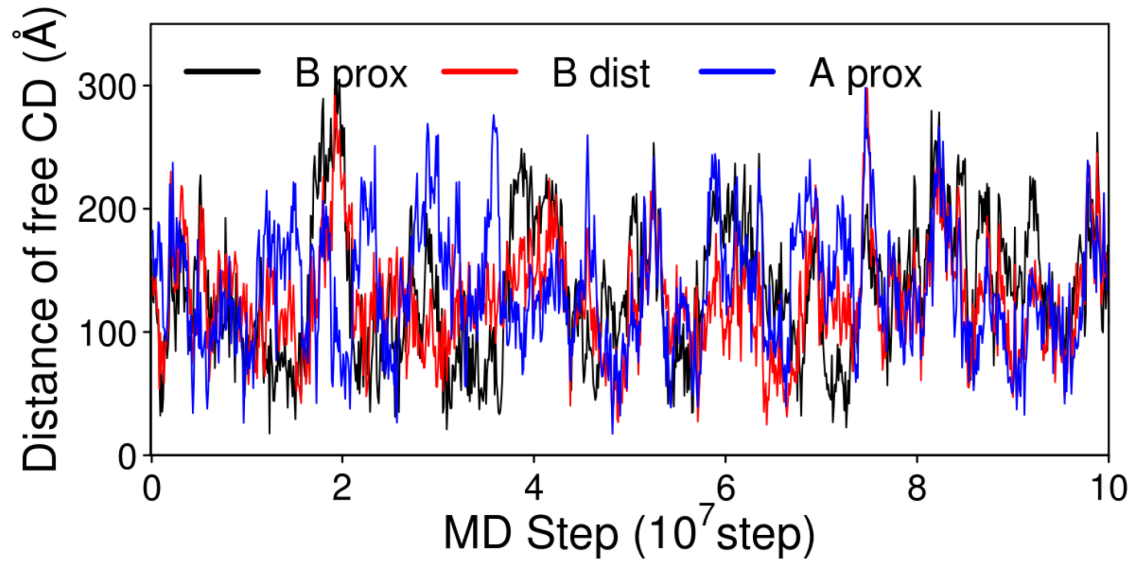

**Figure S8. A representative trajectory of HP1 $\alpha$  on nucleosomes where one CD is bound on the tri-methylated “A distal H3K9” and the other CD is free at the initial conformation. The other three H3K9s are assumed to be un-methylated. Time courses of the distances from the free CD to three H3K9s are plotted.**

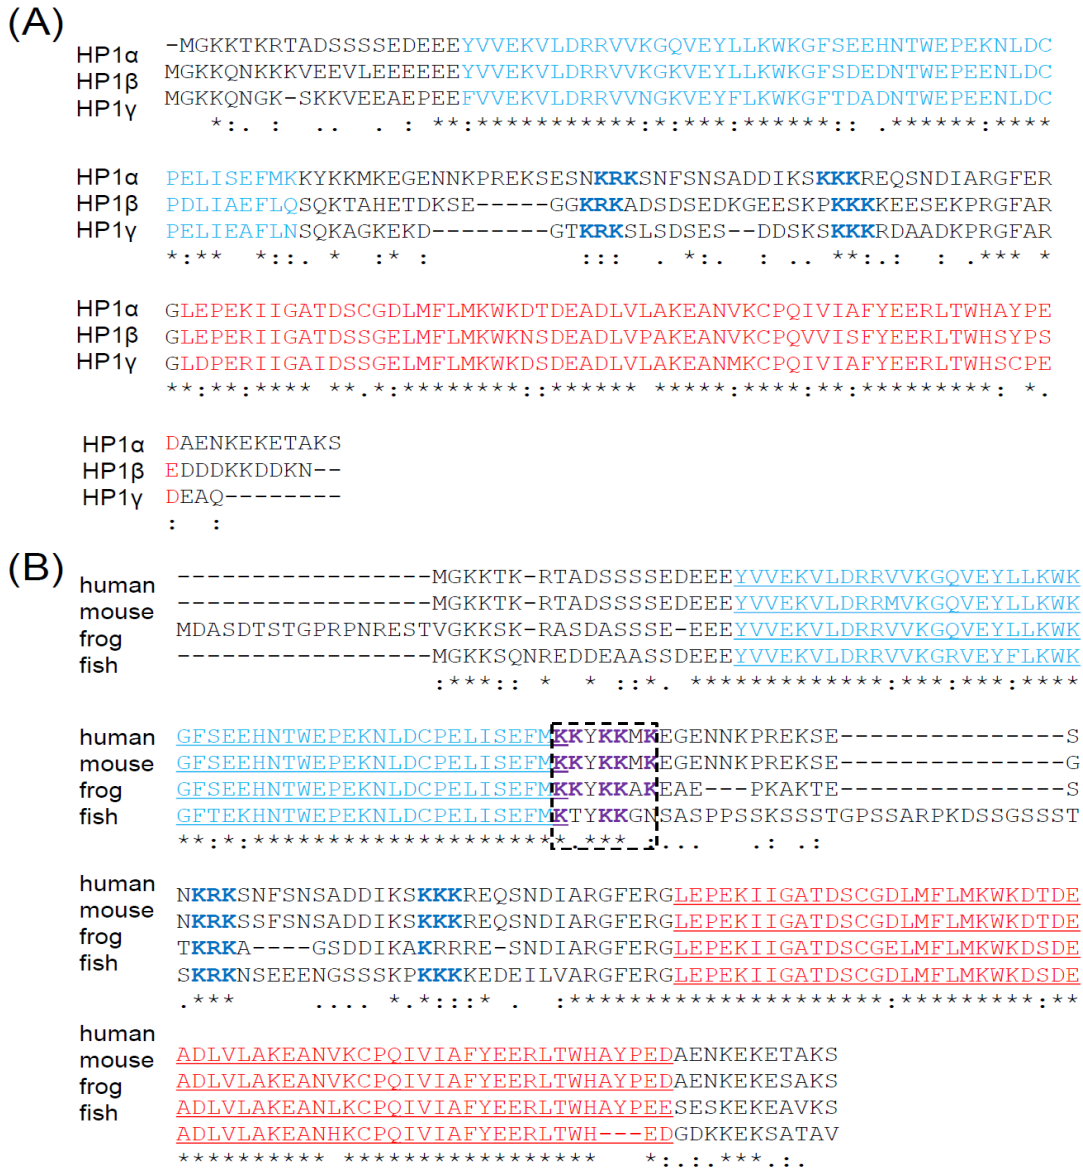

**Figure S9. Alignment of HP1 sequences.** Human HP1 isoforms (A) and HP1 $\alpha$  from several species (B) were aligned using ClustalW (<http://www.genome.jp/tools/clustalw>). Regions corresponding to CD and CSD were indicated with light blue and red letters, respectively. Conserved two basic amino acids patches (KRK and KKK) in HR are shown in blue bold letters. Lysine residues close to CD are highly conserved among species (purple letters) B) The accession number of human HP1 $\alpha$ ,  $\beta$ ,  $\gamma$ , mouse HP1 $\alpha$ , frog HP1 $\alpha$ , and fish HP1 $\alpha$  are NM\_012117.1, NM\_006807, AB030905, NP\_001070257, NP\_001080863, and AAI29318, respectively. Identical amino acid is indicated as \*, while homologous amino acid is as . or :.

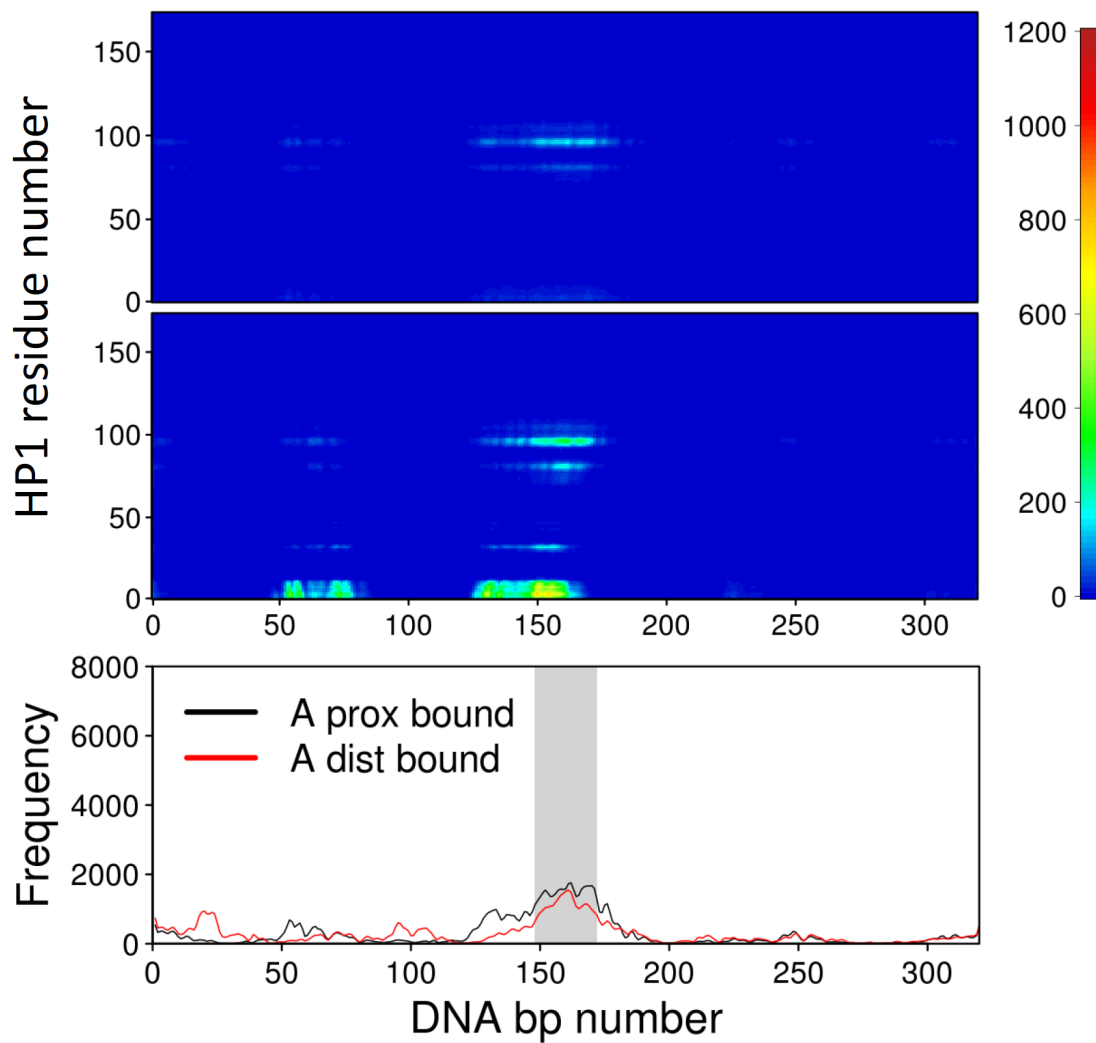

**Figure S10. HP1 $\gamma$ -DNA interactions in molecular simulations.** A) The horizontal axis indicates DNA base pair index of di-nucleosome; 1-147; nucleosome A, 148-172; linker DNA, 173-319. The vertical axis means residues in the HP1 $\gamma$  dimer; the bottom half for the bound HP1 $\gamma$  and the top half for the free HP1 $\gamma$ . Contact frequencies are represented by colors (see the right bar for the color definition). B) Frequency of HP1 $\gamma$  binding to every nucleotides in DNA.

## Figure 2B

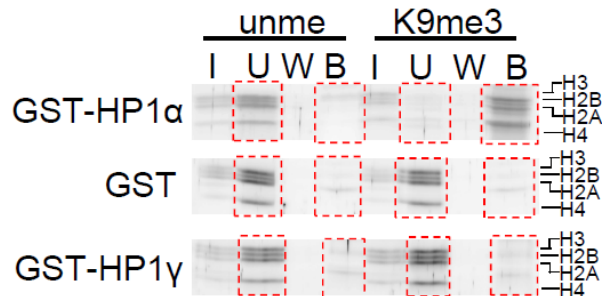

## Figure 6B

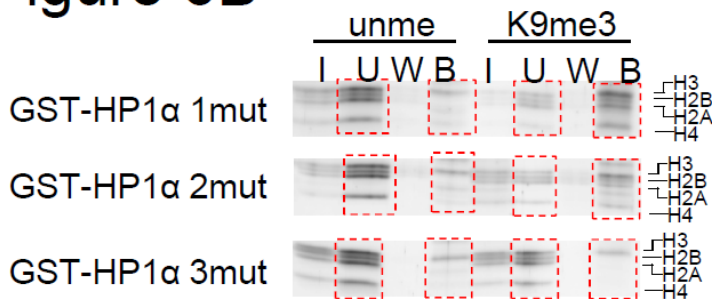

## Figure 6E

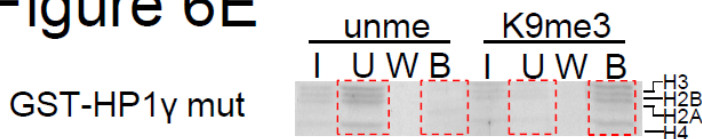

**Figure S11. Whole gel images for the main figures.** The regions excised are shown as red boxes with broken lines. In panels for Figures 2B, 6B, and 6E, the input (one-fourth of each) (I), unbound (U), wash (W), and bound (B) fractions were electrophoresed and visualized. For the binding experiments, unmethylated H3 (unme) or H3K9me3 (K9me3) di-nucleosomes were used. The positions of GST, GST-HP1α, GST-HP1γ, H2A, H2B, H3 and H4 are indicated in each corresponding images.

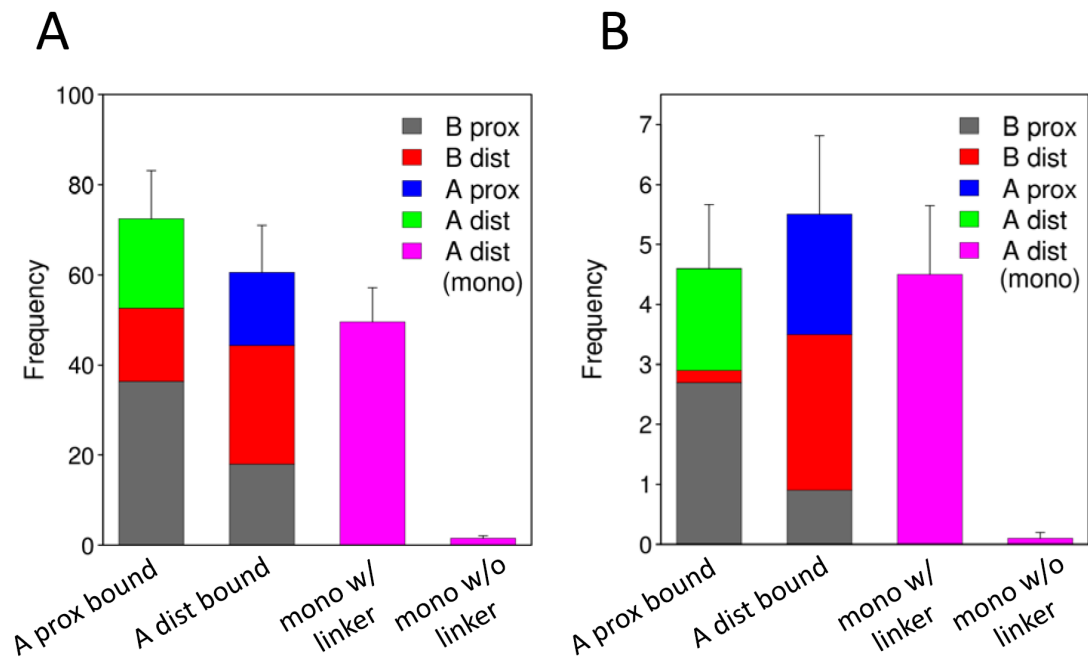

**Figure S12. Results of HP1 $\alpha$ -di-nucleosome molecular simulations where one CD is bound on the tri-methylated H3K while the other CD is free.** This is similar plot to Fig.4 with the different cutoffs. The number of occurrence where the distance was below (A)  $6.6 \times 3 \text{ \AA}$  and (B)  $6.6 \times 2 \text{ \AA}$  are depicted.

### **Supporting Movies**

Movie S1. A coarse-grained molecular simulation movie that corresponds to Fig. 3.

Movie S2. A fully-atomistic molecular simulation movie that corresponds to Fig. 9.
